1 Global gene-expression analysis reveals the molecular processes underlying CIC-5 loss-of-  
2 function in novel Dent Disease 1 cellular models

3

4 Mónica Durán<sup>1,\*</sup> Carla Burballa<sup>1,2,\*</sup> Gerard Cantero-Recasens<sup>1,2</sup>, Cristian Butnaru<sup>2</sup>, Vivek  
5 Malhotra<sup>2,3</sup>, Gema Ariceta<sup>4</sup>, Eduard Sarró<sup>1,#</sup>, Anna Meseguer<sup>1,#</sup>

6

7 Affiliations

8 1. Renal Physiopathology Group, Vall d'Hebron Research Institute (VHIR)-CIBBIM  
9 Nanomedicine, Barcelona, Spain.

10 2. Centre for Genomic Regulation, The Barcelona Institute of Science and Technology,  
11 Barcelona, Spain.

12 3. Institució Catalana de Recerca i Estudis Avançats, Barcelona, Spain.

13 4. Pediatric Nephrology department. Vall d'Hebron University Hospital, Universitat  
14 Autònoma de Barcelona, Barcelona, Spain.

15 \* The authors wish it to be known that, in their opinion, the first two authors should be  
16 regarded as joint First Authors.

17

18 # Eduard Sarró and Anna Meseguer should be considered joint senior authors.

19 Correspondence to:

20 1. Eduard Sarró ([eduard.sarro@vhir.org](mailto:eduard.sarro@vhir.org))

21 2. Anna Meseguer ([ana.meseguer@vhir.org](mailto:ana.meseguer@vhir.org))

22 Address: Passeig Vall d'Hebron 119-129, 08035, Barcelona, Spain

23

24 Key words: Dent Disease 1, CLNC5, CIC-5, cellular model, RPTEC/TERT1 cells,  
25 endocytosis.

26 **Abstract**

27

28 Dent disease 1 (DD1) is a rare X-linked renal proximal tubulopathy characterized by  
29 low molecular weight proteinuria (LMWP) and variable degree of hypercalciuria,  
30 nephrocalcinosis and/or nephrolithiasis with progression to chronic kidney disease (CKD).  
31 Although loss-of-function mutations in the gene *CLCN5* encoding the electrogenic  $\text{Cl}^-/\text{H}^+$   
32 antiporter CIC-5, which impair endocytic uptake in proximal tubule cells, cause the disease,  
33 there is poor genotype-phenotype correlation and their contribution to proximal tubule  
34 dysfunction remains unclear. Here, in order to discover the mechanisms leading to proximal  
35 tubule dysfunction due to CIC-5 loss-of-function, we have generated and characterized new  
36 human cellular models of DD1 by silencing *CLCN5* and introducing the CIC-5 pathogenic  
37 mutants V523del, E527D and I524K into the human proximal tubule-derived cell line  
38 RPTEC/TERT1. Depletion of *CLCN5* or expression of mutant CIC-5 impairs albumin  
39 endocytosis, increases substrate adhesion and decreases collective migration, which  
40 correlates with a less differentiated epithelial phenotype. Interestingly, although all conditions  
41 compromised the endocytic capacity in a similar way, their impact on gene expression  
42 profiles was different. Our DNA microarray studies show that CIC-5 silencing or mutant re-  
43 introduction alter pathways related to nephron development, anion homeostasis, organic  
44 acid transport, extracellular matrix organization and cell migration, compared to control cells.  
45 Cells carrying the V523del CIC-5 mutation show the largest differences in gene expression  
46 vs WT cells, which is in agreement with the more aggressive clinical phenotype observed in  
47 some DD1 patients. Overall, this work emphasizes the use of human proximal tubule derived  
48 cell models to identify the molecular processes underlying CIC-5 deficiency.

## 49 **Introduction**

50

51 Dent disease 1 (DD1; OMIM #300009) is a rare X-linked renal tubulopathy affecting  
52 about 330 families world-wide [1] and characterized by low molecular weight proteinuria  
53 (LMWP), and variable degree of hypercalciuria, nephrocalcinosis, calcium nephrolithiasis,  
54 and hypophosphatemic rickets [2,3]. DD1 progresses to renal failure between the 3rd and  
55 5th decades of life in 30-80% of affected males, while female carriers are usually  
56 asymptomatic [4]. There is no current curative treatment for DD1 and patient's care is  
57 supportive, focusing on the treatment of hypercalciuria and the prevention of nephrolithiasis  
58 [5]. DD1 is caused by loss-of-function mutations in the *CLCN5* gene encoding the  
59 electrogenic 2 Cl<sup>-</sup>/H<sup>+</sup> antiporter CIC-5, which is abundantly expressed in the epithelia of  
60 kidney and intestine, though it is also expressed in brain, lung and, to a lesser extent, liver  
61 [6]. In the human kidney, CIC-5 is mainly expressed in proximal tubule cells (PTCs), where it  
62 is predominantly located in intracellular subapical endosomes and participates in endosomal  
63 acidification [2,7]. A small fraction of CIC-5 is also found on the plasma membrane of PTCs,  
64 where it is proposed to mediate plasma membrane chloride currents [7] or participate in the  
65 macromolecular complexes responsible for LMW protein and albumin endocytosis [8].

66 PTCs reabsorb approximately 65% of filtered load and most, if not all, of filtered LMW  
67 proteins mainly via receptor-mediated endocytosis [9]. The main actor in LMW protein  
68 reabsorption is the endocytic complex, which is comprised by the multiligand tandem  
69 receptors megalin and cubilin. Receptor-mediated endocytosis requires a continuous cycling  
70 of megalin and cubilin between the apical plasma membrane, where they specifically bind  
71 ultrafiltrated LMW proteins and other ligands, and the early endosome, where the receptors  
72 dissociate from their bound ligands [10]. This process requires vesicular acidification for  
73 dissociating the ligand-receptor complex, recycling of receptors to the apical membrane, and  
74 progression of ligands into the lysosomes. Endosomal acidification is achieved by ATP-  
75 driven transport of cytosolic H<sup>+</sup> through the vacuolar H<sup>+</sup>-ATPase [11]. Inactivating mutations

76 of *CLCN5* in Dent disease patients [12] as well as the deletion of *CLCN5* in knock-out (KO)  
77 mice [13,14] lead to severe LMWP due to a defective endocytic uptake in PTCs, which has  
78 been associated with the disappearance of megalin and cubilin at the brush border of PTCs.  
79 CIC-5 was initially postulated to provide a Cl<sup>-</sup> shunt into the lumen of endosomes to dissipate  
80 V-ATPase-mediated H<sup>+</sup> accumulation, thereby enabling efficient endosomal acidification  
81 [11,15]. However, mutations in CIC-5 causing Dent disease do not necessarily lead to a  
82 defective endosomal acidification [16], suggesting that the disease may result from an  
83 impaired exchange activity, namely uncoupling Cl<sup>-</sup>/H<sup>+</sup> co-transport and altered  
84 Cl<sup>-</sup> accumulation at early endosomes [17]. Thus, the precise molecular role of CIC-5 in  
85 endosomal physiology and endocytosis, as well as several aspects of its ion transport  
86 properties remain to be fully elucidated.

87 To date, a total of 266 pathogenic variants of *CLCN5* have been reported consisting  
88 of nonsense, missense, splice site, insertion and deletion mutations [1,18]. According to the  
89 latest reports, *CLCN5* mutations are grouped into three classes on the basis of functional  
90 data [16,18,19]: class 1 mutations result in defective protein processing and folding, thereby  
91 inducing retention of the mutant protein in the endoplasmic reticulum (ER), where they are  
92 early degraded by quality control systems; class 2 mutations impair protein processing and  
93 stability, leading to a functionally defective protein lacking electric currents; these mutants  
94 show reduced expression in the plasma membrane, but a normal distribution in the early  
95 endosomes; and class 3 mutations generate a protein that reaches the plasma membrane  
96 and early endosomes correctly, but shows reduced or abolished currents.

97 Yet, very little is known regarding how these mutations lead to specific disease  
98 manifestations. In this sense, the considerable intra-familial variability in disease severity  
99 and the lack of genotype-phenotype correlation suggest that unknown mechanisms might be  
100 involved in PTCs dysfunction leading to DD1 progression. In order to identify these CIC-5  
101 mutation-associated pathways, we have silenced the *CLCN5* gene or introduced the CIC-5  
102 mutations V523del (not classified), E527D (class 2) or I524K (class 1) in RPTEC/TERT1

103 cells. This cell line represents one of the most well-differentiated and stable proximal tubular  
104 cell line currently available, retaining sodium-dependent phosphate uptake and an intact  
105 functionality of the megalin/cubilin transport system [20,21]. Gene expression profiling and  
106 functional analysis in these cells revealed the biological processes related to proximal tubule  
107 dysfunction in DD1, likely explaining phenotype variability of the disease and the progression  
108 to renal failure.

109 **Results**

110

111 **Expression and subcellular localization of CIC-5 mutants V523del, E527D and I524K in**

112 **RPTEC/TERT1 cells**

113 To explore the molecular mechanisms underlying PTCs dysfunction in DD1, first we  
114 have generated stable RPTEC/TERT1 cell lines silenced for *CLCN5* gene or carrying the  
115 pathogenic CIC-5 mutations V523del, E527D or I524K (described in DD1 patients [22–24]).  
116 We chose to study these mutations because, although their close location within the P helix  
117 of CIC-5, which is involved in dimer interface's formation, and all three mutations resulting in  
118 loss of CIC-5 activity, they differentially affect CIC-5 subcellular localization and functionality  
119 [16,22,23]. I524K is a class I mutation and abolished currents have been related to its  
120 retention in the endoplasmic reticulum (ER) [16]. E527D is a type 2 CIC-5 mutant, and it  
121 lacks currents despite its normal presence in the endosome compartment and partially  
122 (30%) reaching the plasma membrane [16]. Expression of both E527D and I524K mutants in  
123 HEK293 cells also resulted in impaired endosomal acidification and altered protein stability  
124 [16]. V523del effects on subcellular localization and endosomal acidification have not yet  
125 been described.

126 A scheme summarizing the generation of the RPTEC/TERT1 DD1 cell model and the  
127 localization of shRNA sequences and mutations within CIC-5 is provided in figures S1 and  
128 S2. First, to fully characterize these cell lines, RNA was extracted from 10-day differentiated  
129 control, *CLCN5* knockdown (KD), rCIC-5 WT, rCIC-5 V523del, rCIC-5 E527D and rCIC-5  
130 I524K carrying cells and endogenous *CLCN5* and exogenous CIC-5 (HA) levels monitored  
131 by real-time quantitative PCR (RT-qPCR). Our results showed that endogenous levels of  
132 CIC-5 were strongly reduced in all cell lines transduced with the shRNA against CIC-5  
133 compared to control cells (6.2 %, 16.1%, 4.4%, 8.2% and 13% of control shRNA CIC-5  
134 expression levels for *CLCN5* shRNA, rCIC5 WT, rCIC5 V523del, rCIC5 E527D and rCIC5  
135 I524K, respectively) (Fig. 1A). Re-introduction of HA-tagged wild-type (rCIC5 WT) or mutant

136 (rCIC5 V523del, rCIC5 E527D and rCIC5 I524K) CIC-5 in previously CIC-5 silenced cells  
137 restored CIC-5 mRNA levels above those of control cells (Ctrl shRNA) (Fig. 1B), although,  
138 rCIC-5 V523del and rCIC-5 E527D but not rCIC5 I524K mRNA levels were lower than for the  
139 rCIC-5 WT condition (33.8%, 68.7% and 87.9% of rCIC-5 WT CIC-5 expression levels,  
140 respectively). At the protein level, CIC-5 was detected as a lower band running at 80-90 kDa  
141 and a higher diffuse band running as a smear at about 100 kDa, which was consistent with  
142 previous reports [25,26] (Fig. 1C). Loading equivalent amount of cell extract revealed that  
143 the protein levels of all the three CIC-5 mutants were strongly reduced in comparison with  
144 rCIC-5 WT (Fig. 1C).

145 We next analyzed the subcellular localization of WT and mutant CIC-5 in  
146 RPTEC/TERT1 cells by using immunostaining techniques. Our results show that rCIC-5 WT  
147 localized at the plasma membrane (PM), early endosomes (EE) and endoplasmic reticulum  
148 (ER), as shown by co-localization with the specific subcellular compartment markers N-  
149 cadherin (PM), Rab-5 (EE) and KDEL (ER) (Fig. 2A, B and C). Quantification of the co-  
150 localization of CIC-5 forms with KDEL using the Manders' overlap coefficient (MOC)  
151 demonstrated that rCIC5 E527D (MOC = 0.29) and rCIC-5 I524K (MOC = 0.39), but not  
152 rCIC-5 V523del (MOC = 0.17) accumulated at the ER to a greater extent than rCIC-5 WT  
153 (MOC = 0.10). Moreover, all three mutants showed a reduced co-localization with Rab5  
154 (MOC rCIC-5 WT = 0.29, rCIC-5 V523del = 0.09, rCIC5 E527D = 0.16 and rCIC-5 I524K =  
155 0.07) and N-cadherin (MOC rCIC-5 WT = 0.33, rCIC-5 V523del = 0.03, rCIC5 E527D = 0.02  
156 and rCIC-5 I524K = 0.01) in comparison with rCIC-5 WT, indicating that their presence in EE  
157 and PM was reduced. These results confirmed, in the case of E527D and I524K subcellular  
158 localizations, previous results in HEK-MSR cells [16].

159

#### 160 **I524K mutation, but not V523del or E527D presents an altered glycosylation pattern**

161 It has been previously described that CIC-5 undergoes several post-translational  
162 modifications, including glycosylation [27]. Moreover, mutations on CIC-5 N-glycosylation

163 sites trigger poli-ubiquitination and proteasomal degradation [26,27]. To gain more insight on  
164 whether the differences in protein levels and sub-cellular localization between rCIC-5 WT  
165 and CIC-5 mutants could be related to impaired glycosylation processing, cell lysates from  
166 each of the conditions were treated with Endoglycosidase H (Endo H), which cleaves  
167 asparagine-linked mannose rich oligosaccharides, but not highly processed complex  
168 oligosaccharides, and Peptide:N-glycosidase F (PNGase F), which cleaves between the  
169 innermost GlcNAc and asparagine residues of high mannose, hybrid, and complex  
170 oligosaccharides. Our results show that rCIC-5 WT and all mutant forms of CIC-5 were  
171 sensitive to PNGase F digestion, confirming that all them were N-glycosylated (Fig. 3). On  
172 the other hand, only the lower migrating band of I524K mutant was sensible to EndoH  
173 digestion, as observed by a reduction in its molecular weight. These results suggest that this  
174 faster migrating band of the I524K mutant might correspond to a core-glycosylated EndoH-  
175 sensitive form of the protein, correlating with the higher degree of ER retention observed for  
176 this mutant.

177 To investigate whether the expression of CIC-5 mutants, and more specifically,  
178 I524K, could be inducing the Unfolded Protein Response (UPR) and ER stress as a result of  
179 their accumulation in the ER, we checked the phosphorylation of the ER stress marker  
180 PERK [28] (Fig. S2A) and the cleavage of XBP-1 mRNA [28] (Fig. S2B) in cells expressing  
181 WT or mutant CIC-5. Our results show that neither expression of rCIC-5 WT nor any of the  
182 CIC-5 mutants studied induced detectable levels of ER stress.

183

#### 184 **CIC-5 silencing or re-introduction of V523del, E527D and I524K CIC-5 mutants** 185 **impairs Albumin endocytosis**

186 To determine the effect of CIC-5 silencing and the selected CIC-5 mutations on the  
187 endocytic capacity of RPTEC/TERT1 cells, we analyzed Alexa Fluor 488-labelled albumin  
188 uptake. Detection of labeled albumin within the cell boundaries, both in orthogonal views and  
189 single planes, of control cells demonstrated that the endocytic machinery functions properly



190 in the RPTEC/TERT1 cell line (Fig. 4A). CIC-5 silencing strongly reduced the uptake of  
191 labelled albumin, whereas the endocytic capacity was re-established when the wild-type  
192 CIC-5 was re-introduced in the silenced cells (number of albumin particles/cell Ctrl shRNA =  
193 7.23, *CLCN-5* shRNA = 2.27 and rCIC-5 WT = 6.57) (Fig. 4A and B). By contrast, re-  
194 introduction of neither V523del nor E527D nor I524K CIC-5 mutants was unable to restore  
195 this activity (number of albumin particles/cell rCIC-5 V523del = 3.15, rCIC-5 E527D = 3.7 and  
196 rCIC-5 I524K = 2.58), what indicates that these residues are essential for CIC-5-mediated  
197 endocytosis (Fig. 4A and B). In addition, the volume of particles (which is related to the  
198 amount of endocytosed albumin) was also reduced by depleting *CLCN5* (volume of particles  
199 Ctrl shRNA = 0.19 and *CLCN-5* shRNA = 0.09) or expression of loss-of-function CIC-5  
200 mutants (volume of particles rCIC-5 WT = 0.24, rCIC-5 V523del = 0.11, rCIC-5 E527D = 0.13  
201 and rCIC-5 I524K = 0.08) (Fig. 4C).

202

203 **CIC-5 silencing or re-introduction of CIC-5 mutations V523del, E527D and I524K**  
204 **alter the global gene expression profile of RPTEC/TERT1 cells**

205 In order to discover potential mechanisms involved in the proximal tubule dysfunction  
206 secondary to the loss of CIC-5, we analyzed the gene expression profile of DD1 cell models  
207 using DNA microarrays. To make the data comparable, as well as to remove technical  
208 biases, microarray data were first normalized and batch effect corrected. The Principal  
209 Component Analysis (PCA) obtained after applying these corrections is shown in figure 5A,  
210 where it can be observed that samples were mainly grouped by condition. In addition, and to  
211 validate the reliability of the results obtained from the DNA microarray, the expression levels  
212 of *EMX2*, *PTPRD*, *STEAP1*, *ZPLD1*, *CDH1*, *NR1H4* and *EHF* genes were analyzed by qRT-  
213 PCR (Fig. S3). Validation genes were selected among those that meet the following  
214 requirements: i) their expression was altered by some of the mutations compared to the WT  
215 condition and, ii) its expression was also modified by the silencing of *CLCN5* and totally or  
216 partially restored by CIC-5 WT re-introduction. Our results show that all the validation genes

217 presented an expression pattern similar to that in the DNA microarray (Fig. S3), thereby  
218 confirming the trustworthiness of the microarray data.

219 Figure S4 shows the number of genes in the DNA microarray whose expression was  
220 altered within a range of logFC for an adjusted p value lower than 0.05 in each of the  
221 comparisons that we have performed in this work. For comparative analysis, genes were  
222 defined as differentially expressed genes (DEGs) if they presented an adjusted p value lower  
223 than 0.05 and a log<sub>2</sub> Fold Change (logFC) higher or equal to 0.5 in any of the comparisons  
224 studied. Top up- and down-regulated DEGs in each of the comparisons are shown in  
225 Supplementary Tables S1-8.

226 The Heatmap in Figure 5B graphically illustrates the differences in the gene  
227 expression profile of CIC-5-silenced cells in comparison to control cells and CIC-5-silenced  
228 cells with WT CIC-5 re-introduced. These results show that CIC-5 silencing elicited a marked  
229 effect on the gene expression profile of RPTEC/TERT1 cells, and that this effect was  
230 partially reversed by re-introducing the rCIC-5 WT (Fig. 5B). Notably, from the 1563 genes  
231 altered by CIC-5 silencing, up to 452 (from a total of 466 commonly regulated genes) were  
232 regulated in the opposite direction by CIC-5 re-introduction (Fig. 5C). Among these, 237  
233 (52%) genes were down-regulated and 215 (48%) were up-regulated by the effect of CIC-5  
234 silencing. Only the genes that were commonly regulated by CIC-5 silencing and rCIC-5 WT  
235 re-introduction (452 genes) were considered for subsequent analysis. To study in which  
236 biological processes (BP) were involved these genes, we performed an analysis of over-  
237 represented gene ontology (GO) terms. A list of the biological process GO terms significantly  
238 enriched is shown in Figure 5D. We identified GO terms related to (intersection size/term  
239 size): response to wounding (36/372), matrix organization (27/397), anion homeostasis  
240 (5/65), cell adhesion (16/275), cell migration (29/569), positive regulation of reactive oxygen  
241 species (ROS) (12/107) and nephron development (13/146), among others. In anion  
242 homeostasis significantly changed transcripts were SLC34A2, NR1H4, TFAP2B, SFRP4 and

243 SLC7A11, and in nephron development were ADAMTS16, TFAP2B, NOG, FMN1, LGR4,  
244 DLL1, COL4A4, KIF26B, SULF1, NID1, TACSTD2, PROM1 and BMP4.

245 In order to explore the effects of the selected CIC-5 mutations on the transcriptome of  
246 RPTEC/TERT1 cells, gene expression profiles of V523del, E527D and I524K mutants were  
247 compared to that of WT CIC-5. As shown in the heatmap in figure 6A, V523del and I524K  
248 were the conditions that exhibited the greatest and the smallest differences in the gene  
249 expression profile, respectively, when compared to WT CIC-5. Moreover, only 5 genes  
250 (CHCHD7, PREX1, PLAG1, LIN54 and ZRANB3) were commonly affected by all three  
251 mutations (Fig. 6B). Re-introduction of V523del mutant altered the expression of 831 genes  
252 compared to CIC-5 WT cells, from which 231 were down-regulated and 600 were up-  
253 regulated. Roughly 20% (47/231) of the down- and 5% (27/600) of the up-regulated genes  
254 by Val523del expression were also found down- or up-regulated, respectively, in CIC-5-  
255 silenced cells, and might represent genes whose expression levels cannot be restored by  
256 V523del mutant to the levels achieved by WT CIC-5. On the other hand, genes altered by  
257 V523del that were not affected in CIC-5 silenced cells could be indicating a gain of  
258 functionality of this mutant with regard to CIC-5 silencing. An analysis of the significantly  
259 enriched biological processes (GO terms) showed that V523del altered the expression of  
260 genes mainly related to DNA replication, but also related to carboxylic acid and anion  
261 transport and renal system development, among others (Fig. 6C). CIC-5 mutant E527D  
262 altered the expression of 510 genes (204 down-regulated and 306 up-regulated). Among  
263 them, 24% of the down- (49/204) and 16% (48/306) of the up-regulated genes were also  
264 found down- or up-regulated, respectively, by effect of CIC-5 silencing. Genes whose  
265 expression was significantly altered by E527D in comparison to WT CIC-5 were specially  
266 enriched in processes related to tissue remodeling and morphogenesis, but also in other  
267 processes including (intersection size/term size): sialic acid transport (3/7), sodium ion  
268 transmembrane transport (8/152) and also renal system development (19/315), for example  
269 (Fig. 6D). Finally, I524K CIC-5 mutation altered the expression of only 32 genes compared to

270 CIC-5 WT, with 6 of them down-regulated and 26 up-regulated. This low number of genes  
271 did not allow to obtain any significantly enriched GO term in the over-representation  
272 analysis.

273

274 **CIC-5 silencing and mutations V523del, E527D and I524K impair cell-to-substrate**  
275 **adhesion and collective cell migration**

276 We next explored whether the changes observed in the gene expression profiles by  
277 CIC-5-silencing or loss-of-function CIC-5 mutations correlated with changes in the epithelial  
278 characteristics (e.g. substrate adhesion or cell migration). For this purpose, we analyzed  
279 epithelial markers' levels (e.g. CDH1, occludin, and Keratin-7 and -18), cell proliferation,  
280 substrate adhesion and collective cell migration. Results in Figure 7A show that CIC-5  
281 silencing strongly reduced E-Cadherin and Keratin-7 levels, while it had no effect on occludin  
282 and Keratin-18 levels. Re-introduction of rCIC-5 WT, but not CIC-5 mutants V523del, E527D  
283 or I524K, totally rescued E-cadherin and keratin-7 expression (Fig 7A). Our results also  
284 show that, in comparison to control cells, CIC-5 silencing increased cell-to-substrate  
285 adhesion (Fig. 7B), reduced collective cell migration (Fig. 7C) and, although not in a  
286 statistically significant manner, increased cell proliferation (Fig. 7D). In a similar way, all  
287 three CIC-5 mutants increased cell-to-substrate adhesion (Fig. 7E) and reduced collective  
288 cell migration (Fig. 7F) when compared to the respective control rCIC-5 WT. By contrast, no  
289 apparent differences were observed in the proliferation rates of CIC-5 mutant cell lines  
290 compared to cells carrying the WT protein (Fig. 7G). Taken together, these results suggest  
291 that both CIC-5 silencing and expression of CIC-5 mutants could lead cells into a  
292 dedifferentiated state.

293 **Discussion**

294

295 Besides reports describing the effects of *CLCN5* mutations on chloride currents and  
296 endosomal acidification, there is a paucity of studies addressing the impact of these  
297 mutations on the phenotype and expression profile of PTCs. Consequently, little is known  
298 about the potential mechanisms involved in the proximal tubule dysfunction secondary to the  
299 loss of CIC-5. Moreover, evidences indicate that CLC-5 mutations causing defective  
300 proximal tubular endocytosis and endosomal trafficking may not necessarily impair  
301 endosomal acidification, suggesting that these processes may not be coupled and that  
302 tubular dysfunction in DD1 may not result from reduced endosomal acidification [16,29]. In  
303 this sense, one of the most striking conclusions of this study is that despite the lack of CIC-5  
304 or the presence of CIC-5 mutations V523del, E527D and I524K compromised the endocytic  
305 capacity of RPTEC/TERT1 in a similar way, they do not exert equivalent effects on the gene  
306 expression profile of these cells, and only five genes were commonly modulated by these  
307 mutations. This suggests that mutant forms of CIC-5 may alter different cellular processes  
308 apart from the endocytic pathway. Accordingly, in this work we aimed to discover the  
309 mechanisms that underlie tubule dysfunction in DD1 by characterizing the phenotypical  
310 consequences of CIC-5 mutations on PTCs.

311 For this purpose, we have generated novel Dent disease cell models by stably  
312 transfecting *CLCN5* shRNA and pathogenic CIC-5 mutations into the RPTEC/TERT1 cell  
313 line, which maintains many differentiation hallmarks [20]. The use of cell lines takes  
314 advantage of an uniform genetic background thus avoiding compensatory effects due to  
315 currently unknown polymorphisms or mutations in other genes. In addition, use of cell  
316 models is of special interest in Dent disease, where renal biopsy are not routinely indicated  
317 since i) laboratory findings and genetic testing can be sufficient for diagnosis and ii) most  
318 DD1 patients are children and it's not worth applying an invasive procedure if it cannot  
319 provide relevant information. In these cell models, we have characterized CIC-5 mutant

320 proteins and have identified genes and biological processes specifically regulated by CIC-5  
321 silencing or re-introduction of mutants forms of CIC-5. In this regard, we found that  
322 RPTEC/TERT1 cells lacking CIC-5 showed a marked loss of epithelial markers, an increase  
323 in cell to substrate adhesion, reduced collective cell migration and a trend suggesting an  
324 increase in cell proliferation, all of them characteristics of epithelial dedifferentiation. This  
325 correlated with an altered expression of genes related to reactive oxygen species, cell-cell  
326 adhesion, cell migration, extracellular matrix organization or cell motility among others. In the  
327 same direction, Gally et al [30] found that PTCs taken from CIC-5 KO mice had increased  
328 expression of proliferation markers and oxidative scavengers, suggesting that PT  
329 dysfunction in CIC-5 KO mice was associated with oxidative stress, dedifferentiation and  
330 increased cell proliferation. Moreover, the urinary proteome of patients with Dent disease  
331 has been shown to be enriched with proteins actively participating in interstitial matrix  
332 remodeling [31]. Thereby, our results are aligned with the hypothesis raised by Devuyst and  
333 Luciani [17] explaining the potential mechanism by which the loss of CIC-5 may cause  
334 proximal tubule dysfunction. According to the authors, and in addition to the impaired  
335 trafficking and recycling of apical receptors and the defective receptor-mediated endocytosis,  
336 loss of CIC-5 would be also associated with altered lysosomal function. This might  
337 compromise the lysosomal mediated-degradation and clearance of autophagosomes  
338 containing ubiquitinated proteins and dysfunctional mitochondria, leading to excessive  
339 production of reactive oxygen species (ROS). The increase in ROS might alter the integrity  
340 of the junctional complex proteins, releasing transcription factors, which will translocate to  
341 the nucleus and promote proliferation. It is noteworthy that we did not detect a significant  
342 enrichment of GO terms related to phagocytosis in neither CIC-5 silenced cells nor cells  
343 carrying V523del, E527D nor I524K CIC-5 mutations, thereby suggesting the existence of  
344 other molecular mechanisms converging on PTCs dedifferentiation and dysfunction. In this  
345 sense, and in addition to the abovementioned GO terms, CIC-5 silencing also altered the  
346 expression of genes related to biological processes such as anion homeostasis, chemotaxis  
347 or response to growth factor. Moreover, terms such as morphogenesis of an epithelial bud

348 and nephron development point at a role of CIC-5 in kidney development. It is worth  
349 mentioning that GO terms found in CIC-5-silenced RPTC/TERT1 cells including organ  
350 development, ion transport, response to external stimulus, response to wounding, regulation  
351 of cell differentiation, chemotaxis and taxis were also found in the gene microarray analysis  
352 from proximal S1 and S2 tubules of CIC-5 KO mouse kidneys mice of the Guggino group  
353 [32], indicating that our cell model mimics the PTCs of the CIC-5 KO mouse. By contrast, we  
354 did not find terms related to lipid metabolism, which was the class with the greatest  
355 number of changes in gene transcript level in the CIC-5 KO mice [32]. That result was  
356 surprising because overall changes in lipids have not been reported in Dent disease. When  
357 we analyzed the list of genes altered by CIC-5 silencing, we found that among the most  
358 down-regulated genes there were genes that could be relevant in relation to DD1. Such an  
359 examples are SLPI (Secretory Leukocyte Peptidase Inhibitor; logFC -5.01), which has been  
360 related to PTCs regeneration [33], MUC1 (Mucin1; logFC -4.72), whose mutation causes a  
361 rare form of tubulointerstitial fibrosis [34], SLC34A2 (Sodium-dependent phosphate transport  
362 protein 2B; logFC -4.01), which may contribute to the diminution in the uptake of both  
363 sodium and phosphate in the proximal tubules in Dent disease patients, the Rab GTPase  
364 RAB27B (logFC -1.50), which is involved in exosome secretion, COL4A4 (Collagen Type IV  
365 Alpha 4 Chain; logFC -0.92), which is mutated in patients with Alport syndrome, the kidney-  
366 Specific Cadherin CDH16 (logFC -2.25), which is involved in cell-cell adhesions or KLF4  
367 (Kruppel Like Factor 4; logFC -0.99) which has been identified as a renal lineage master  
368 regulatory transcription factor [35]. Taken together, these results suggest that lack of CIC-5  
369 widely affects the phenotype of RPEC/TERT1 cells, but it remains to be known whether lack  
370 of CIC-5 impacts on these processes through its effect on endosomal acidification, altered  
371 chloride transport, protein endocytosis, or its participation in macromolecular complexes. For  
372 instance, endocytic trafficking contributes to cell adhesion and migration in different ways  
373 [36]. First, internalization of chemokines by scavenger receptors is essential for sensing the  
374 chemotactic gradients, whereas endocytosis and subsequent recycling of chemokine  
375 receptors is key for sustaining the responsiveness of migrating cells. Second, endosomal

376 pathways modulate adhesion by delivering integrins to their site of action and supplying  
377 factors for focal adhesion disassembly. Finally, endosomal transport also contributes to cell  
378 migration by delivering membrane type 1 matrix metalloprotease to the leading edge  
379 facilitating proteolysis-dependent chemotaxis.

380 One of the most striking results of the present work is the reduced number of  
381 biological processes commonly altered by CIC-5 silencing and re-introduction of CIC-5  
382 mutations, and between each of the mutations, even though all conditions impaired albumin  
383 endocytosis and cell differentiation. Moreover, that's despite their close location in CIC-5's  
384 helix P and the fact that amino acids V523 and E527 are highly conserved residues present  
385 in all known CICs [16,22,23]. Thus, only the GO terms "extracellular matrix organization" and  
386 "extracellular structure organization" were commonly found in the CIC-5 silencing and  
387 V523del and E527D conditions, while only the GO terms "urogenital system development"  
388 and "renal system development" were common in V523del and E527D, although the term  
389 "nephron development" appeared in the CIC-5 silencing condition. Moreover, only 5 genes  
390 were commonly altered by all three mutations (CHCHD7, PREX1, PLAG1, LIN54 and  
391 ZRANB3). Accordingly, this lack of a functional equivalence between the absence of CIC-5  
392 or the presence of CIC-5 mutants in relation to the biological processes point to a gain of  
393 functionality of the mutated forms of CIC-5.

394 Interestingly, V523del was the condition, among the different mutants studied, with  
395 the largest differences in gene profile when compared to the wild-type form. This could  
396 explain, in part, that V523del CIC-5 mutation has been found in a pediatric patient with a  
397 severe clinical phenotype [37], although the lack of more individuals carrying the same  
398 mutation makes impossible to establish such a correlation. Genes altered by V523del CIC-5  
399 mutation were mainly involved in cell cycle and proliferation, which are processes that have  
400 been linked to a dedifferentiation state, but also in carboxylic acid and anion transport, and  
401 renal system development biological processes. Unexpectedly, cells carrying V523del CIC-5  
402 only showed a small non-significant increase in cell proliferation compared to rCIC-5 WT  
403 cells, thereby suggesting that the V523del-modulated genes included in proliferation GO



404 terms could indeed be mediating dedifferentiation. On the other hand, we found altered an  
405 elevated number of genes from the solute carrier (SLC) group of membrane transport  
406 proteins. SLC transporters show high expression levels in metabolically active organs such  
407 as the kidney, liver or brain [38], and the kidney has been identified as one of the target  
408 organs for most high expression of SLCs-mediated diseases [39]. For instance, we found  
409 up-regulated the type I sodium-dependent phosphate transporters SLC17A1 (NPT1) and  
410 SLC17A3 (NPT4), which are the two most up-regulated genes in this condition, and also  
411 SLC27A2 (Fatty Acid Transporter FATP2), SLC16A4 (Monocarboxylate Transporter 4  
412 MCT4) and SLC4A4 (Sodium Bicarbonate Cotransporter NBC1), all of them being involved  
413 in renal diseases [39]. To cite some, SLC17A1 and SLC4A4 mutations cause Fanconi  
414 Syndrome. By contrast, neither CIC-5 silenced cells nor any mutant condition showed an  
415 altered expression of the sodium-bile acid cotransporter SLC10A2, which was one of the  
416 gene transcripts most increased in transcript number (17 fold) in the *CLCN5* knockout mice  
417 proximal tubules of the Guggino group [32]. However, we found that V523del cells had a  
418 significant enrichment of the biological process “bile acid synthesis and transport”, and  
419 genes contained in this GO term, such as the bile acid receptor NR1H4, and the nuclear  
420 receptor NR1D1 or the Very Long-Chain Acyl-CoA Synthetase SLC27A2, were also among  
421 the most up-regulated genes in V523del cells. Thus, the fact that V523del CIC-5 up-  
422 regulates so many genes codifying for apical and basolateral membrane co-transporters  
423 may suggest the existence of compensatory pathways to overcome the defective receptor-  
424 mediated endocytosis caused by CIC-5 loss-of-function. Besides that, and as mentioned  
425 above, renal development was another biological process altered in V523del cells. Amid the  
426 genes belonging to this biological process, we found highly up-regulated (logFC = 2.31) the  
427 transcription factor HES1 (hairy and enhancer of split-1), since it has been previously  
428 identified as a renal lineage master regulatory transcription factor, playing an important role in  
429 the Notch signaling pathway [35]. As for V523del down-regulated genes, it is remarkable to  
430 note that much of the most down-regulated genes, such as CDH1, MFAP5 or LUM,  
431 participate in the extracellular matrix organization. This effect could in part explain the

432 reduced collective cell migration rates of the cells carrying the V523del mutation. Finally, it is  
433 also worth mentioning that cells carrying V523del mutation downregulate SLC3A1 gene,  
434 which codifies for the amino acid transporter ATR1 and is found mutated in cystinuria  
435 patients [39].

436 As mentioned earlier, E527 is one of the most conserved amino acids and is present  
437 in all the known CICs, including those from plants, yeast, *Escherichia coli*, cyanobacteria,  
438 fish and mammals [16,23]. In addition, it has been previously described that the E527D CIC-  
439 5 mutant has a dominant negative effect on endosomal acidification [16], and mutation of the  
440 corresponding residue in CIC-0 results in a reversion of voltage dependence, i.e currents  
441 were activated by hyperpolarization instead of depolarization [40]. It is striking that, in our  
442 cell model, a large part of the biological processes altered after introduction of the E527D  
443 mutation were related to tissue remodeling, morphogenesis, differentiation and development.  
444 Interestingly, the biological processes “Organ development” and “organ morphogenesis”  
445 were the 2<sup>nd</sup> and 8<sup>th</sup> GO terms, respectively, with the greatest number of significantly  
446 changed transcripts in the CIC-5 KO mice of the Guggino group [32]. Other biological  
447 processes, such as sialic acid transport, sodium ion transmembrane transport and, cell  
448 substrate adhesion, BMP signaling pathway or T cell activation appeared altered in  
449 RPTEC/TERT1 cells carrying E527D CIC-5. In this sense, genes related to T cell activation,  
450 such as genes of the human leukocyte antigen (HLA) system (HLA-DRB1, logFC 1.79; HLA-  
451 DMA, logFC 1.55; and HLA-DPA1, logFC 1.44) or the lymphocyte cytosolic protein 1 (LCP-1,  
452 logFC -1.46) and Thy-1 cell surface antigen (THY1, logFC -1.44) are among of the most up  
453 or down regulated genes by E527D re-introduction. These results are consistent with  
454 microarray data obtained from intestine of CIC-5 KO mice showing altered expression of  
455 genes implicated in the immune system [41], and with the proposed role for CIC-5 in the  
456 immunopathogenesis of ulcerative colitis [42]. In addition, we also found biological pathways  
457 related to bone remodeling. Since bone homeostasis is tightly connected to phosphate  
458 metabolism, an enrichment of such biological processes could be indeed reflecting an  
459 altered phosphate regulation in PTCs. Moreover, alteration of these processes in PTCs

460 could be related to the increased bone turnover previously described in the CIC-5 KO mouse  
461 model of Dent's disease, likely explaining the propensity to altered bone homeostasis in  
462 young Dent's patients [43].

463 Curiously, introduction of the CIC-5 mutant I524K in RPTEC/TERT1 cells only altered  
464 the expression of a reduced number of genes, yielding, among the different mutants studied,  
465 the gene expression profile that more closely resembled that of the rCIC-5 WT condition.  
466 These results were unexpected considering that i) the I524K mutant presented the highest  
467 degree of ER localization among the different CIC-5 mutants studied, and ii) the lack of a  
468 correspondence between I524K mRNA and protein levels might indicate that this mutant  
469 exhibits reduced protein stability or impaired post-translational processing. The increased  
470 ER retention of I524K, however, does not translate to an induction of the UPR, suggesting  
471 that I524K would be rapidly targeted to proteasomal degradation without displaying an ER  
472 stress gene signature. Proteasomal degradation, in turn, could explain the reduced levels of  
473 I524K protein that we detected by Western blot. A possible explanation for the reduced  
474 phenotypic effects of I524K would be that, although most of the proteins would be retained in  
475 the ER, a small but sufficient amount of the I524K proteins would manage to escape from  
476 the ER and reach its functional localization. This hypothesis would imply that I524K is,  
477 beyond its retention in the ER, a functional protein able to produce chloride currents. The  
478 reduced number of genes modulated by I524K did not allow to find statistically enriched GO  
479 terms. However, an analysis of the DEGs in I524K cells shed some light about the potential  
480 processes altered by this mutation. In this sense, the top down-regulated genes, CDH1 (E-  
481 cadherin) and KRT7 (keratin-7), correspond to well-established epithelial markers. This  
482 expression profile is aligned with the reduced cell to substrate adhesion and collective cell  
483 migration observed in rCIC-5 I524K cells. Moreover, the third most down-regulated gene,  
484 CATSPER1, corresponds to a voltage-gated calcium channel, and the fifth, SLC38A8, to a  
485 putative sodium-dependent amino-acid/proton antiporter. On the other hand, PREX1, a  
486 guanine nucleotide exchange factor for RAC1, and the ferroxidase enzyme Ceruloplasmin

487 (CP) were the most up-regulated genes by I524K. PREX1, which is one of the few genes  
488 altered by all the three CIC-5 mutations studied, has been identified as an important factor in  
489 tumor cell invasion and metastasis in a number of cancer models [44]. As for CP, it has been  
490 described that it plays an important role in cellular iron homeostasis and could protect kidney  
491 against a damage from iron excess [45]. Interestingly, CP was also found up-regulated in KO  
492 mice of the Guggino group, and the molecular function “iron ion binding” appeared in sixth  
493 position in the GO miner analysis of DEGs [32].

494 In conclusion, in this work we have generated new cell models of Dent disease that  
495 accurately reproduce CIC-5 defects and we have demonstrated that, besides the established  
496 critical function of CIC-5 in endocytosis, there are other mutation-associated pathways that  
497 could be relevant for the etiopathogenesis of DD1, likely explaining the phenotypic variability  
498 of DD1 patients. In this sense, we found that biological processes related to kidney  
499 development, anion homeostasis, organic acid transport, extracellular matrix organization  
500 and cell migration, were among the pathways that more likely could explain the  
501 pathophysiology of Dent disease 1.

502 **Declarations**

503 Compliance with Ethical Standards.

504

505 **Funding**

506 E.S. and M.D. were supported by the generous contribution of Asdent Patients Association.

507 C.B was a recipient form the PhD4MD program. This work was supported in part by Asdent

508 Patients Association and grants from Ministerio de Ciencia e Innovación (SAF201459945-R

509 and SAF201789989-R to A.M.), the Fundació Senefro (SEN2019 to A.M.) and Red de

510 Investigación Renal REDinREN (12/0021/0013). A.M. group holds the Quality Mention from

511 the Generalitat de Catalunya (2017 SGR).

512

513 **Conflict of interest**

514 The authors declare that they have no competing interests.

515

516 **Acknowledgments**

517 We thank the patient advocacy group Asdent (Asociación de la Enfermedad de Dent,

518 <https://www.asdent.es>) for its continuous support. We thank all members of the Meseguer

519 Lab for valuable discussions. Cell cytometry was carried out at the High Technology Unit at

520 Vall d'Hebron Research Institute (VHIR). Fluorescence microscopy was performed at the

521 Advanced Light Microscopy Unit at the CRG, Barcelona; and at the High Technology Unit at

522 Vall d'Hebron Research Institue (VHIR). V.Malhotra is an Institució Catalana de Recerca i

523 Estudis Avançats professor at the Centre for Genomic Regulation. This work reflects only

524 the authors' views, and the EU Community is not liable for any use that may be made of the

525 information contained therein.

526 **Methods**

527

528 **Cell culture**

529 Renal proximal tubule epithelial cells RPTEC/TERT1 were obtained from the  
530 American Type Culture Collection (ATCC®; #CRL-4031). RPTEC/TERT1 were cultured in  
531 Dulbecco's Modified Eagle Medium: Nutrient Mixture F-12 (1:1, v/v) (Thermo Fisher  
532 Scientific, #31331093) supplemented with 20 mM HEPES (Gibco, #15630-080), 60 nM  
533 sodium selenite (Sigma Aldrich, #S9133), 5 µg/ml transferrin (Sigma Aldrich, #T1428), 50  
534 nM dexamethasone (Sigma Aldrich, #D8893), 100 U/ml penicillin and 100 µg/ml  
535 streptomycin (Gibco, #15240-062), 2% fetal bovine serum (Gibco, #10270), 5 µg/ml insulin  
536 (Sigma Aldrich, #I9278), 10 ng/ml epidermal growth factor (Sigma Aldrich, #E4127) and 3  
537 nM triiodothyronine (Sigma Aldrich, #T5516). Cultures were maintained at 37 °C in a 5%  
538 CO<sub>2</sub> atmosphere. Unless otherwise indicated, cell were cultured for 10 days to allow cell  
539 differentiation.

540

541 **Gene silencing**

542 For *CLCN5* silencing, the MISSION® TRC shRNA transfer vector containing the CIC-  
543 5 shRNA target sequence CACCGAGAGATTACCAATAA (Sigma-Aldrich,  
544 #TRCN0000043904) was co-transfected with the third generation vectors VSVG, RTR2 and  
545 PKGPIR, which provide the envelope, packaging and reverse-expressing proteins,  
546 respectively, into HEK-293 cells. Supernatants containing viral particles were then  
547 harvested, supplemented with 10% FBS, 1% non-essential amino acids and 8 µg/mL  
548 polybrene (Sigma-Aldrich, #TR-1003) and added to RPTEC/TERT1 cells, followed by  
549 antibiotic-mediated selection (8 µg/mL puromycin, Invivogen, #ant-pr).

550

551 **Vectors and Site-directed mutagenesis**

552 For shRNA rescue experiments, wild-type human *CLCN5* was cloned into pDONR  
553 vectors (pDONR™221, Invitrogen, #12536-017) using the Gateway cloning system

554 (Invitrogen). In order to escape from degradation by the RISC complex, silent mutations  
555 (c.[99C>T; 100C>A; 102A>G; 105G>A; 108T>C; 111C>A; 114T>C]) were introduced in the  
556 shRNA targeting sequence of human *CLCN5*. Over the shRNA-rescuing *CLCN5* vector, we  
557 introduced the following mutations in the *CLCN5* gene: V523del (c.1566-1568del), E527D  
558 (c.1581A>T) and I524K (c.1571T>A). In addition, an HA-tag was also added in the C-  
559 terminus of each cDNA. Subsequently, all inserts were sub-cloned to an expression vector  
560 containing hygromycin resistance (pLenti CMV Hygro DEST 117-1, Addgene) using the  
561 Gateway recombination system. All constructs generated were stably transduced into  
562 previously *CLCN5* silenced cells using lentiviral particles produced in HEK-293 cells and  
563 were subsequently selected with 400 µg/ml hygromycin (Invivogen, #ant-hg-5). Site-directed  
564 mutagenesis was performed with the QuikChange® II XL Site-Directed Mutagenesis Kit  
565 (Agilent Technologies) and primers were designed using the QuikChange Primer Design tool  
566 (Agilent Technologies).

567

#### 568 **RNA extraction and qPCR**

569 Total RNA was isolated from cells using TRIzol® Reagent (#15596-026, Life Technologies)  
570 following the manufacturer's protocol. cDNA was reverse-transcribed using the High-  
571 Capacity cDNA Reverse Transcription Kit (Applied Biosystems, #4387406). Endogenous  
572 and exogenous levels of *CLCN5* mRNA were measured using SYBR green probes (Applied  
573 Biosystems) and normalized against TBP using the following primers: Endogenous *CLCN5*:  
574 5'- GGGATAGGCACCGAGAGAT -3' and 5'- GGTTAAACCAGAATCCCCCTGT -3';  
575 Exogenous *CLCN5*: 5'- GGTTACACACAACGGGCGAT -3', and 5'-  
576 CGTAATCTGGAACATCGTA -3'; and TBP: 5'- CGGCTGTTTAACTTCGCTTC -3' and 5'-  
577 CAGACGCCAAGAAACAGTGA -3'. In order to validate the microarray analysis was used  
578 the following TaqMan probes (Applied Biosystems): STEAP1 (Hs00185180\_m1), ZPLD1  
579 (Hs00604192\_m1), PTPRD (Hs00369913\_m1), CDH1 (Hs01023895\_m1), EMX2  
580 (Hs00244574\_m1), NR1H4 (Hs01026590\_m1), EHF (Hs00171917\_m1), TBP  
581 (Hs00427620\_m1). Analysis was performed using the 7900HT Sequence Detection System

582 (Applied Biosystems). Relative expression fold change was determined by the comparative  
583  $2^{-\Delta\Delta CT}$  method after normalizing to TBP. For the analysis of XBP-1 splicing, we used the  
584 following primers: 5'- AAACAGAGTAGCAGCGCAGACTGC-3' and 5'-  
585 TCCTTCTGGGTAGACCTCTGGGAG -3'.

586

### 587 **Western blot**

588 Cells were lysed in SET buffer (10 mM Tris-HCl pH 7.4, 150 mM NaCl, 1 mM EDTA  
589 and 1% SDS) and the protein concentration was quantified by the BCA assay (Thermo  
590 Fisher Scientific, #23225). Equal amount of whole cell extracts were resolved by SDS-PAGE  
591 and transferred to PVDF membranes (Millipore, #ISEQ00010). Membranes were blocked  
592 with 5% non-fat dry milk diluted in PBS-T (PBS 1x, Tween-20 0.1%) for 1 hour and  
593 incubated overnight at 4 °C with the appropriated antibodies: HA (dilution 1:1000, Roche,  
594 #867423001),  $\beta$ -tubulin (dilution 1:5000, Sigma, #T4026), E-Cadherin (dilution 1:1000, BD  
595 Transduction Labs, #610181), PERK (dilution 1:1000, Cell Signaling, #5683T), Cytokeratin-  
596 7 (Ventana Medical Systems, #790-4462) and Cytokeratin-18 (dilution 1:1000, Santa Cruz,  
597 #51582). Membranes were then incubated with the corresponding secondary antibodies  
598 (rabbit anti-mouse IgG/HRP, Dako, #P0260 and goat anti-rat IgG/HRP, Sigma, #A9037) at a  
599 1:5000 dilution. Membranes were visualized using chemiluminescence reagent (Millipore,  
600 #WBLUF0500) and exposed on Odyssey Fc Imaging System (Li-Cor).

601

### 602 **Immunocytochemistry (ICC)**

603 RPTC/TERT1 cells were cultured on glass coverslips (Marlenfeld GmbH & Co. KG)  
604 for 10 days. Cells were then washed in cold PBS and fixed in  $-20^{\circ}\text{C}$  methanol for 5 min at  
605 room temperature. Aldehyde groups were quenched in 50 mM  $\text{NH}_4\text{Cl}$ /PBS for 30 min and  
606 non-specific binding sites were blocked with 5% BSA in PBS for 60 min. Coverslips were  
607 incubated overnight at 4 °C with a 1:100 dilution with one of the following primary antibodies:  
608 HA (Roche, #867423001), KDEL (Abcam, #Ab10C3), Rab 5 (Cell Signaling, #3547S) and N-  
609 Cadherin (BD Transduction Labs, #610920), followed by incubation with the corresponding



610 fluorescent-conjugated secondary antibodies (1:500 dilution, AlexaFluor Thermo Fisher  
611 Scientific #A11004, #A28175, #A11011, #A27034, #A21247, #A27012) for 1h at room  
612 temperature. Finally, cells were incubated with Hoechst 33342 (1:2000 dilution) (Invitrogen,  
613 #H1399) for 5 min to stain cell nuclei. Coverslips were then mounted on slides with Prolong  
614 diamond mounting medium (Thermo Fisher Scientific, #P36961) and fluorescence labeling  
615 was visualized in a confocal spectral Zeiss LSM 980 microscope. Acquired images were  
616 processed using ImageJ software and the co-localization analysis was performed using the  
617 ImageJ JACoP plugin. Co-localization was measured using Pearson's and Manders co-  
618 localization coefficients.

619

#### 620 **Glycosylation assay**

621 RPTEC/TERT1 cells were lysed using RIPA buffer supplemented with protease  
622 inhibitor cocktail (Sigma-Aldrich, #P8340) and equal amounts of whole cell extracts were  
623 digested for 18 hours with endoglycosidase H (Endo H, New England, #P0702S) or peptide  
624 N-glycosidase F (PNGase F, New England #P0704S) enzymes following the manufacturer's  
625 instructions.

626

#### 627 **Albumin uptake**

628 Albumin uptake was measured to investigate receptor-mediated endocytosis.  
629 RPTEC/TERT1 cells were seeded on glass coverslips (Marlenfeld GmbH & Co. KG) and  
630 grown for 10 days. To measure albumin uptake, cells were exposed to 50 µg/mL Alexa Fluor  
631 488-conjugated Albumin (Thermo Fisher Scientific, #A13100) for 60 min. At the end of the  
632 incubation period, cells were washed 6 times with ice-cold PBS and fixed in  $-20^{\circ}\text{C}$   
633 methanol for 5 min. To delimitate the cellular perimeter, slides were incubated overnight at  
634  $4^{\circ}\text{C}$  with a 1:100 dilution of N-cadherin antibody (BD Transduction Labs, #610920) followed  
635 by incubation with secondary fluorescence antibody Alexa Fluor Thermo Fisher Scientific,  
636 #A21247) for 1h at room temperature. Cell nuclei were stained with Hoechst 33342 (1:2000  
637 dilution) (Invitrogen, #H1399) for 5 min at room temperature and slides were mounted with

638 Prolong diamond mounting medium (Thermo Fisher Scientific, #P36961). Images were  
639 acquired with a confocal laser scanning microscope (Zeiss LSM 980) and processed using  
640 ImageJ software. Co-localization analysis was performed using the ImageJ JACoP plugin.

641

#### 642 **DNA Microarray**

643 Total RNA for DNA microarray was isolated as indicated before. RNA quality was  
644 checked using Bioanalyzer nano assay (Agilent Technologies). RNA samples representing  
645 five separate experiments from each of the conditions were used. Ten independent  
646 microarrays were performed using the Clariom D arrays (Affymetrix- Genechip array,  
647 #902922) according the manufacturer's protocol.

648

#### 649 **Over representation analysis**

650 GO terms over-representation analysis was performed using the webserver g:Profiler  
651 (<https://biit.cs.ut.ee/gprofiler/gost>) as described in [46].

652

#### 653 **Cell proliferation**

654 Cell proliferation was performed as previously described [47]. Briefly, cells were  
655 incubated with 5  $\mu$ M carboxyfluorescein succinimidyl ester (CFSE, Sigma-Aldrich, #21888)  
656 for 10 min at 37 °C. The unbound CFSE was quenched by washing cells twice in complete  
657 medium. An aliquot of cells was used to measure cell fluorescence at the onset of the  
658 experiment. The rest of labeled cells were seeded on tissue plates and incubated at 37 °C  
659 for 3 days. At the end of this period, fluorescence of daughter cells was measured. Cell  
660 fluorescence was measured on a FACS calibur flow cytometer (Becton Dickinson) and  
661 proliferation indices were determined using the Cell Quest software (Becton Dickenson).

662

#### 663 **Cell adhesion**

664 RPTC/TERT1 cells cultured for 10 days were trypsinized, washed twice with culture  
665 medium to eliminate trypsin and counted. Fifty thousand cells/well were then seeded onto

666 two duplicated 96-well plates for 60 minutes at 37°C. After this period, unattached cells from  
667 one of the plates were removed by washing cells twice with PBS, followed by an additional  
668 incubation period of 60 minutes in medium to facilitate cell recovery. The amount of attached  
669 cells (from the washed plate) and the total cells (from the unwashed plate) was determined  
670 using XTT assay (Sigma, # 11465015001) following the manufacturer's instructions.

671

### 672 **Wound migration assay**

673 For wound migration assay,  $2.25 \times 10^4$  cells were seeded on each of the two  
674 compartments of silicone culture inserts (Ibidi, #81176) and grown for 10 days. At the onset  
675 of the experiment, the culture insert was removed and cells were washed twice with medium  
676 to remove cell debris. Digital images were obtained every 30 minutes with a Thunder  
677 microscope (Leica) and area measurements were performed using ImageJ software.

678

### 679 **Statistical analysis**

680 All statistical analyses were performed using GraphPad Prism 6  
681 (RRID:SCR\_002798) or SigmaPlot 10 (RRID: SCR\_003210) software. Values are expressed  
682 as mean  $\pm$  SEM. Statistical significance was determined by Student's t test or one-way  
683 analysis of variance (ANOVA) followed by Turkey's post hoc test. Criteria for a significant  
684 statistically significant difference were: \*,  $p < 0.05$ ; \*\*,  $p < 0.01$ . Each specific test is indicated  
685 in figure legends.

686 **References**

687

- 688 [1] Mansour-Hendili L, Blanchard A, Le Pottier N, Roncelin I, Lourdel S, Treard C, et al.  
689 Mutation Update of the CLCN5 Gene Responsible for Dent Disease 1. *Hum Mutat*  
690 2015;36:743–52. <https://doi.org/10.1002/humu.22804>.
- 691 [2] Giancesello L, Del Prete D, Ceol M, Priante G, Calò LA, Anglani F. From protein  
692 uptake to Dent disease: An overview of the CLCN5 gene. *Gene* 2020;747:144662.  
693 <https://doi.org/10.1016/j.gene.2020.144662>.
- 694 [3] Shipman KE, Weisz OA. Making a Dent in Dent Disease. *Function* 2020;1:1–9.  
695 <https://doi.org/10.1093/function/zqaa017>.
- 696 [4] Scheinman SJ. X-linked hypercalciuric nephrolithiasis: Clinical syndromes and  
697 chloride channel mutations. *Kidney Int* 1998;53:3–17. <https://doi.org/10.1046/j.1523-1755.1998.00718.x>.
- 699 [5] Devuyst O, Thakker R V. Dent's disease. *Orphanet J Rare Dis* 2010;5:28.  
700 <https://doi.org/10.1186/1750-1172-5-28>.
- 701 [6] Steinmeyer K, Schwappach B, Bens M, Vandewalle A, Jentsch TJ. Cloning and  
702 functional expression of rat CLC-5, a chloride channel related to kidney disease. *J*  
703 *Biol Chem* 1995;270:31172–7. <https://doi.org/10.1074/jbc.270.52.31172>.
- 704 [7] Devuyst O, Christie PT, Courtoy PJ, Beauwens R, Thakker R V. Intra-renal and  
705 subcellular distribution of the human chloride channel, CLC-5, reveals a  
706 pathophysiological basis for Dent's disease. *Hum Mol Genet* 1999;8:247–57.  
707 <https://doi.org/10.1093/hmg/8.2.247>.
- 708 [8] Hryciw DH, Ekberg J, Ferguson C, Lee A, Wang D, Parton RG, et al. Regulation of  
709 albumin endocytosis by PSD95/Dlg/ZO-1 (PDZ) scaffolds: Interaction of Na<sup>+</sup>-H<sup>+</sup>  
710 exchange regulatory factor-2 with CLC-5. *J Biol Chem* 2006;281:16068–77.  
711 <https://doi.org/10.1074/jbc.M512559200>.

- 712 [9] Zhuo JL, Li XC. Proximal nephron. *Compr Physiol* 2013;3:1079–123.  
713 <https://doi.org/10.1002/cphy.c110061>.
- 714 [10] Eshbach ML, Weisz OA. Receptor-Mediated Endocytosis in the Proximal Tubule.  
715 *Annu Rev Physiol* 2017;79:425–48. [https://doi.org/10.1146/annurev-physiol-022516-](https://doi.org/10.1146/annurev-physiol-022516-034234)  
716 [034234](https://doi.org/10.1146/annurev-physiol-022516-034234).
- 717 [11] Satoh N, Suzuki M, Nakamura M, Suzuki A, Horita S, Seki G, et al. Functional  
718 coupling of V-ATPase and CLC-5. *World J Nephrol* 2017;6:14.  
719 <https://doi.org/10.5527/wjn.v6.i1.14>.
- 720 [12] Scheinman SJ, Guay-Woodford LM, Thakker R V., Warnock DG. Genetic Disorders of  
721 Renal Electrolyte Transport. *N Engl J Med* 1999;340:1177–87.  
722 <https://doi.org/10.1056/NEJM199904153401507>.
- 723 [13] Piwon N, Gunther W, Schwake M, Bosl MR, Jentsch TJ. CLC-5 Cl--channel disruption  
724 impairs endocytosis in a mouse model for Dent's disease. *Nature* 2000;408:369–73.  
725 <https://doi.org/10.1038/35042597>.
- 726 [14] Wang SS, Devuyst O, Courtoy PJ, Wang XT, Wang H, Wang Y, et al. Mice lacking  
727 renal chloride channel, CLC-5, are a model for Dent's disease, a nephrolithiasis  
728 disorder associated with defective receptor-mediated endocytosis. *Hum Mol Genet*  
729 2000;9:2937–45. <https://doi.org/10.1093/hmg/9.20.2937>.
- 730 [15] Günther W, Lüchow A, Cluzeaud F, Vandewalle A, Jentsch TJ. CLC-5, the chloride  
731 channel mutated in Dent's disease, colocalizes with the proton pump in  
732 endocytotically active kidney cells. *Proc Natl Acad Sci U S A* 1998;95:8075–80.  
733 <https://doi.org/10.1073/pnas.95.14.8075>.
- 734 [16] Smith AJ, Reed AAC, Loh NY, Thakker R V., Lippiat JD. Characterization of dent's  
735 disease mutations of CLC-5 reveals a correlation between functional and cell  
736 biological consequences and protein structure. *Am J Physiol - Ren Physiol*  
737 2009;296:390–7. <https://doi.org/10.1152/ajprenal.90526.2008>.

- 738 [17] Devuyt O, Luciani A. Chloride transporters and receptor-mediated endocytosis in the  
739 renal proximal tubule. *J Physiol* 2015;593:4151–64. <https://doi.org/10.1113/JP270087>.
- 740 [18] Giancesello L, Ceol M, Bertoldi L, Terrin L, Priante G, Murer L, et al. Genetic analyses  
741 in dent disease and characterization of CLCN5 mutations in kidney biopsies. *Int J Mol*  
742 *Sci* 2020;21:1–20. <https://doi.org/10.3390/ijms21020516>.
- 743 [19] Lourdel S, Grand T, Burgos J, González W, Sepúlveda F V., Teulon J. CIC-5  
744 mutations associated with Dent's disease: A major role of the dimer interface.  
745 *Pflugers Arch Eur J Physiol* 2012;463:247–56. [https://doi.org/10.1007/s00424-011-](https://doi.org/10.1007/s00424-011-1052-0)  
746 [1052-0](https://doi.org/10.1007/s00424-011-1052-0).
- 747 [20] Wieser M, Stadler G, Jennings P, Streubel B, Pfaller W, Ambros P, et al. hTERT  
748 alone immortalizes epithelial cells of renal proximal tubules without changing their  
749 functional characteristics. *Am J Physiol Physiol* 2008;295:F1365–75.  
750 <https://doi.org/10.1152/ajprenal.90405.2008>.
- 751 [21] Aschauer L, Carta G, Vogelsang N, Schlatter E, Jennings P. Expression of xenobiotic  
752 transporters in the human renal proximal tubule cell line RPTEC/TERT1. *Toxicol Vitr*  
753 *2015;30:95–105*. <https://doi.org/10.1016/j.tiv.2014.12.003>.
- 754 [22] Wu F, Reed AAC, Williams SE, Loh NY, Lippiat JD, Christie PT, et al. Mutational  
755 analysis of CLC-5, cofilin and CLC-4 in patients with dent's disease. *Nephron -*  
756 *Physiol* 2009;112. <https://doi.org/10.1159/000225944>.
- 757 [23] Lloyd SE, Günther W, Pearce SHS, Thomson A, Bianchi ML, Bosio M, et al.  
758 Characterisation of renal chloride channel, CLCN5, mutations in hypercalciuric  
759 nephrolithiasis (kidney stones) disorders. *Hum Mol Genet* 1997;6:1233–9.  
760 <https://doi.org/10.1093/hmg/6.8.1233>.
- 761 [24] Takemura T, Hino S, Ikeda M, Okada M, Igarashi T, Inatomi J, et al. Identification of  
762 Two Novel Mutations in the CLCN5 Gene in Japanese Patients With Familial  
763 Idiopathic Low Molecular Weight Proteinuria (Japanese Dent's Disease). *Am J Kidney*

- 764 Dis 2001;37:138–43. [https://doi.org/10.1016/S0272-6386\(01\)80067-6](https://doi.org/10.1016/S0272-6386(01)80067-6).
- 765 [25] Grand T, Mordasini D, L'Hoste S, Pennaforte T, Genete M, Biyeyeme M-J, et al.  
766 Novel CLCN5 mutations in patients with Dent's disease result in altered ion currents  
767 or impaired exchanger processing. *Kidney Int* 2009;76:999–1005.  
768 <https://doi.org/10.1038/ki.2009.305>.
- 769 [26] D'Antonio C, Molinski S, Ahmadi S, Huan LJ, Wellhauser L, Bear CE. Conformational  
770 defects underlie proteasomal degradation of Dent's disease-causing mutants of CIC-  
771 5. *Biochem J* 2013;452:391–400. <https://doi.org/10.1042/BJ20121848>.
- 772 [27] Schmieder S, Bogliolo S, Ehrenfeld J. N-glycosylation of the *Xenopus laevis* CIC-5  
773 protein plays a role in cell surface expression, affecting transport activity at the  
774 plasma membrane. *J Cell Physiol* 2007;210:479–88.  
775 <https://doi.org/10.1002/jcp.20882>.
- 776 [28] Osowski CM, Urano F. Measuring ER stress and the unfolded protein response using  
777 mammalian tissue culture system. *Methods Enzymol* 2011;490:71–92.  
778 <https://doi.org/10.1016/B978-0-12-385114-7.00004-0>.
- 779 [29] Gorvin CM, Wilmer MJ, Piret SE, Harding B, van den Heuvel LP, Wrong O, et al.  
780 Receptor-mediated endocytosis and endosomal acidification is impaired in proximal  
781 tubule epithelial cells of Dent disease patients. *Proc Natl Acad Sci U S A*  
782 2013;110:7014–9. <https://doi.org/10.1073/pnas.1302063110>.
- 783 [30] Gailly P, Jouret F, Martin D, Debaix H, Parreira KS, Nishita T, et al. A novel renal  
784 carbonic anhydrase type III plays a role in proximal tubule dysfunction. *Kidney Int*  
785 2008;74:52–61. <https://doi.org/10.1038/sj.ki.5002794>.
- 786 [31] Santucci L, Candiano G, Anglani F, Bruschi M, Tosetto E, Cremasco D, et al. Urine  
787 proteome analysis in Dent's disease shows high selective changes potentially  
788 involved in chronic renal damage. *J Proteomics* 2016;130:26–32.  
789 <https://doi.org/10.1016/j.jprot.2015.08.024>.

- 790 [32] Wright J, Morales MM, Sousa-Menzes J, Ornellas D, Sipes J, Cui Y, et al.  
791 Transcriptional adaptation to Clcn5 knockout in proximal tubules of mouse kidney.  
792 *Physiol Genomics* 2008;33:341–54.  
793 <https://doi.org/10.1152/physiolgenomics.00024.2008>.
- 794 [33] Ochi A, Chen D, Schulte W, Leng L, Moeckel N, Piecychna M, et al. MIF-2/D-DT  
795 enhances proximal tubular cell regeneration through SLPI- and ATF4-dependent  
796 mechanisms. *Am J Physiol - Ren Physiol* 2017;313:F767–80.  
797 <https://doi.org/10.1152/ajprenal.00683.2016>.
- 798 [34] LaFavers KA, El-Achkar TM. Autosomal dominant tubulointerstitial kidney disease: a  
799 new tool to guide genetic testing. *Kidney Int* 2020;98:549–52.  
800 <https://doi.org/10.1016/j.kint.2020.05.046>.
- 801 [35] Hiratsuka K, Monkawa T, Akiyama T, Nakatake Y, Oda M, Goparaju SK, et al.  
802 Induction of human pluripotent stem cells into kidney tissues by synthetic mRNAs  
803 encoding transcription factors. *Sci Rep* 2019;9:1–13. [https://doi.org/10.1038/s41598-](https://doi.org/10.1038/s41598-018-37485-8)  
804 [018-37485-8](https://doi.org/10.1038/s41598-018-37485-8).
- 805 [36] Maritzen T, Schachtner H, Legler DF. On the move: Endocytic trafficking in cell  
806 migration. *Cell Mol Life Sci* 2015;72:2119–34. [https://doi.org/10.1007/s00018-015-](https://doi.org/10.1007/s00018-015-1855-9)  
807 [1855-9](https://doi.org/10.1007/s00018-015-1855-9).
- 808 [37] Ramos-Trujillo E, Claverie-Martin F, Garcia-Nieto V, Ariceta G, Vara J, Gonzalez-  
809 Acosta H, et al. Dent's disease: Identification of seven new pathogenic mutations in  
810 the CLCN5 gene. *J Pediatr Genet* 2013;2:133–40. [https://doi.org/10.3233/PGE-](https://doi.org/10.3233/PGE-13061)  
811 [13061](https://doi.org/10.3233/PGE-13061).
- 812 [38] Schumann T, König J, Henke C, Willmes DM, Bornstein SR, Jordan J, et al. Solute  
813 carrier transporters as potential targets for the treatment of metabolic disease.  
814 *Pharmacol Rev* 2020;72:343–79. <https://doi.org/10.1124/pr.118.015735>.
- 815 [39] Zhang Y, Zhang Y, Sun K, Meng Z, Chen L. The SLC transporter in nutrient and



- 816 metabolic sensing, regulation, and drug development. *J Mol Cell Biol* 2018;11:1–13.  
817 <https://doi.org/10.1093/jmcb/mjy052>.
- 818 [40] Ludewig U, Jentsch TJ, Pusch M. Inward rectification in CIC-0 chloride channels  
819 caused by mutations in several protein regions. *J Gen Physiol* 1997;110:165–71.  
820 <https://doi.org/10.1085/jgp.110.2.165>.
- 821 [41] Maritzen T, Rickheit G, Schmitt A, Jentsch TJ. Kidney-specific upregulation of vitamin  
822 D3 target genes in CIC-5 KO mice. *Kidney Int* 2006;70:79–87.  
823 <https://doi.org/10.1038/sj.ki.5000445>.
- 824 [42] Alex P, Ye M, Zachos NC, Sipes J, Nguyen T, Suhodrev M, et al. Clcn5 Knockout  
825 Mice Exhibit Novel Immunomodulatory Effects and Are More Susceptible to Dextran  
826 Sulfate Sodium-Induced Colitis . *J Immunol* 2010;184:3988–96.  
827 <https://doi.org/10.4049/jimmunol.0901657>.
- 828 [43] Silva I V, Cebotaru V, Wang H, Wang X-T, Wang SS, Guo G, et al. The CIC-5  
829 Knockout Mouse Model of Dent's Disease Has Renal Hypercalciuria and Increased  
830 Bone Turnover. *J Bone Miner Res* 2003;18:615–23.  
831 <https://doi.org/10.1359/jbmr.2003.18.4.615>.
- 832 [44] Cook DR, Rossman KL, Der CJ. Rho guanine nucleotide exchange factors:  
833 Regulators of Rho GTPase activity in development and disease. *Oncogene*  
834 2014;33:4021–35. <https://doi.org/10.1038/onc.2013.362>.
- 835 [45] Jiang B, Liu G, Zheng J, Chen M, Maimaitiming Z, Chen M, et al. Hephaestin and  
836 ceruloplasmin facilitate iron metabolism in the mouse kidney. *Sci Rep* 2016;6:1–11.  
837 <https://doi.org/10.1038/srep39470>.
- 838 [46] Reimand J, Isserlin R, Voisin V, Kucera M, Tannus-Lopes C, Rostamianfar A, et al.  
839 Pathway enrichment analysis and visualization of omics data using g:Profiler, GSEA,  
840 Cytoscape and EnrichmentMap. *Nat Protoc* 2019;14:482–517.  
841 <https://doi.org/10.1038/s41596-018-0103-9>.

842 [47] Sarró E, Durán M, Rico A, Bou-Teen D, Fernández-Majada V, Croatt AJ, et al.  
843 Cyclophilins A and B Oppositely Regulate Renal Tubular Epithelial Cell Phenotype. *J*  
844 *Mol Cell Biol* 2020;34. <https://doi.org/10.1093/jmcb/mjaa005>.

845

846 **Figure Legends**

847

848 **Figure 1. Expression levels of CIC-5 mutants V523del, E527D and I524K in**

849 **RPTEC/TERT1 cells.** DD1 cell models were generated by silencing *CLCN5* and re-  
850 introducing either wild-type (WT) or mutant (V523del, E527D and I524K) forms of CIC-5. To  
851 escape from RISC-mediated degradation, re-introduced CIC-5 forms incorporated silent  
852 mutations in the shRNA target sequence. (A) To validate that the *CLCN5* gene was silenced  
853 in all cell lines transduced with the *CLCN5* shRNA, mRNA levels of endogenous *CLCN5*  
854 were measured by RT-qPCR using specific probes targeting the intact shRNA target  
855 sequence. (B) The expression levels of re-introduced WT (rCIC-5 WT) and mutant (rCIC-5  
856 V523del, rCIC-5 E527D and rCIC-5 I524K) CIC-5 were assessed by RT-qPCR using specific  
857 probes against the HA-tag, which is only present in the exogenous CIC-5. (C) Protein levels  
858 of re-introduced WT and mutant CIC-5 were analyzed by Western blot using an antibody  
859 against the HA-tag. Tubulin was used to ensure that equal amounts of total cell extract were  
860 loaded in each lane. For all experiments, Ctrl shRNA corresponds to cells transduced with  
861 both shRNA empty vector and re-expression empty vector. \*,  $p < 0.05$ ; \*\*,  $p < 0.01$ .

862

863 **Figure 2. V523del, E527D and I524K mutations alter the subcellular localization of CIC-**

864 **5 in RPTEC/TERT1 cells.** Subcellular localization of WT (rCIC-5 WT) and mutant (rCIC-5  
865 V523del, rCIC-5 E527D and rCIC-5 I524K) CIC-5 was analyzed in RPTEC/TERT1 cells  
866 seeded on glass coverslips by determining their co-localization with the endoplasmic  
867 reticulum (ER) marker KDEL (A), early endosomes (EE) marker Rab-5 (B) and plasma  
868 membrane (PM) marker N-cadherin (C), using the corresponding antibodies. Cell nuclei  
869 were stained with DAPI. Quantification of the co-localization was performed using the  
870 Manders' overlap coefficient (MOC). \*,  $p < 0.05$ ; \*\*,  $p < 0.01$ .

871

872 **Figure 3. I524K CIC-5 mutant, but not V523del or E527D, presents an altered**

873 **glycosylation pattern.** To explore the effects of selected CIC-5 mutations on the

874 glycosylation pattern of CIC-5, total cell lysates from RPTEC/TERT1 cells carrying each of  
875 the mutations were treated with Endoglycosidase H (E), which cleaves asparagine-linked  
876 mannose rich oligosaccharides, but not highly processed complex oligosaccharides, and  
877 Peptide:N-glycosidase F (PNGase F) (P), which cleaves between the innermost GlcNAc and  
878 asparagine residues of high mannose, hybrid, and complex oligosaccharides. After  
879 glycosidase reactions, samples were analyzed by Western Blot using an anti HA-tag  
880 antibody.

881

882 **Figure 4. CIC-5 silencing or V523del, E527D and I524K CIC-5 mutations impair**

883 **Albumin endocytosis.** To determine the effects of CIC-5 silencing and the selected CIC-5  
884 mutations on the endocytic capacity of RPTEC/TERT1 cells, we analyzed Alexa Fluor 488-  
885 labelled albumin uptake. (A) Cells were seeded on glass coverslips and incubated with 50  
886  $\mu\text{g/mL}$  Alexa Fluor 488-conjugated Albumin for 60 min. After extensive washing,  
887 endocytosed albumin was detected within the cells. In the orthogonal view, dotted lines  
888 across the images demarcates the top surface of the cell. Quantification of albumin uptake  
889 was performed by measuring the number of albumin particles/cell (B) and the volume of  
890 albumin particles (C), which is related to the amount of endocytosed albumin. \*,  $p < 0.05$ ; \*\*,   
891  $p < 0.01$ .

892

893 **Figure 5. CIC-5 silencing alter the global gene expression profile of RPTEC/TERT1**

894 **cells.** To identify the potential mechanisms involved in the proximal tubule dysfunction  
895 secondary to the loss of CIC-5, we analyzed the gene expression profile of RPTEC/TERT1  
896 cells carrying *CLCN5* silencing or rCIC-5 WT using DNA microarrays. (A) Principal  
897 Component Analysis (PCA) obtained after normalization and batch effect corrections of the  
898 DNA microarray data. (B) Heatmap graphically illustrating the differences in the gene  
899 expression profile of CIC-5-silenced cells (*CLCN5* shRNA) in comparison to control cells  
900 (control shRNA) and CIC-5-silenced cells where WT CIC-5 was re-introduced (rCIC-5 WT).

901 (C) Venn diagrams depicting the genes commonly regulated by the effect of *CLCN5*  
902 silencing and rCIC-5 WT re-introduction. The table indicates the number of common genes  
903 that are up- or down-regulated in each comparison. (D) Analysis of over-represented gene  
904 ontology (GO) terms biological processes (BP) related to the genes commonly up- or down-  
905 regulated by the effect of *CLCN5* silencing and rCIC-5 WT re-introduction, using the  
906 GProfiler server.

907

908 **Figure 6. CIC-5 mutations V523del, E527D and I524K exert different effects on**  
909 **RPTEC/TERT1 gene expression profile.** In order to explore the effects of the selected CIC-  
910 5 mutations on the transcriptome of RPTEC/TERT1 cells, gene expression profiles of  
911 V523del, E527D and I524K mutants were compared to that of WT CIC-5. (A) Heatmap  
912 showing that V523del and I524K were the conditions that exhibited the greatest and the  
913 smallest differences in the gene expression profile, respectively, when compared to WT CIC-  
914 5. (B) Venn diagrams depicting the number of commonly regulated genes by CIC-5  
915 mutations. Only 5 genes were shown to be commonly affected by all three mutations.  
916 Analysis of the significantly enriched biological processes associated with the genes up- or  
917 down-regulated by V523del (C) or E527D (D) mutations in comparison to CIC-5 WT.

918

919 **Figure 7. CIC-5 silencing and mutations V523del, E527D and I524K impair cell-to-**  
920 **substrate adhesion and collective cell migration.** To explore whether the changes  
921 observed in the gene expression profiles by CIC-5-silencing or loss-of-function CIC-5  
922 mutations correlated with changes in the epithelial characteristics, we analyzed substrate  
923 adhesion, proliferation and collective cell migration in RTEC/TERT1 cells. (A) Epithelial  
924 markers CDH1, occludin, and Keratin-7 and -18 were analyzed by Western Blot. (B and E)  
925 Cell-to-substrate adhesion as assessed by the ability of RPTEC/TET1 cells to bind to tissue  
926 culture substrate (B). (C and F) Cell proliferation was measured by staining cells with CFSE  
927 and quantifying the fluorescence of the cells at the onset of the experiment and 4 days later.

928 (D and G) collective cell migration, which depends on the integrity of cell-cell contacts, was  
929 determined with the Wound healing assay as indicated in methods. \*,  $p < 0.05$ ; \*\*,  $p < 0.01$ .

930

931 **Figure S1. Generation of Dent disease 1 cell models.** To explore the molecular  
932 mechanisms underlying PTCs dysfunction in DD1, we have generated stable  
933 RPTEC/TERT1 cell lines silenced for *CLCN5* gene or carrying the pathogenic CIC-5  
934 mutations V523del, E527D or I524K. (A) *CLCN5* was initially silenced in RPTEC(TERT1  
935 cells using lentiviral shRNA vectors, and cells carrying *CLCN5* silencing were selected with  
936 the antibiotic puromycin. To re-introduce wild-type (WT) or mutant CIC-5, we introduced  
937 silent mutations in the shRNA target sequence to prevent RISC-mediated degradation.  
938 Subsequently, we mutated CIC-5 residues V523, E527 and I524K and we transduced the  
939 previously CIC-5 silenced cells. Cells carrying both *CLCN5* shRNA and re-introduced CIC-5  
940 forms were isolated using dual antibiotic selection (puromycin and hygromycin). (B) Scheme  
941 depicting CIC-5 the canonical 746-amino acid CIC-5 protein with its 18 membrane spanning  
942  $\alpha$ -helices, and the localization of shRNA target sequences and mutations V523, E527D and  
943 I524K within the helix P of CIC-5.

944

945 **Figure S2. Expression of mutant CIC-5 proteins does not induce ER stress in**  
946 **RPTEC/TERT1 cells.** To investigate whether the expression of CIC-5 mutants could be  
947 inducing the Unfolded Protein Response (UPR) and ER stress as a result of their  
948 accumulation in the ER, we checked the activation status of markers of the main branches of  
949 ER stress, i.e, PERK and XBP-1. As positive controls, cells were treated with the well-  
950 established ER stress inducers brefeldin-A (BfA) or Tunicamycin (Tn). (A) Western blots  
951 showing that only BfA, but not Tn, *CLCN5* silencing or expression of CIC-5 mutants induced  
952 a shift in the molecular weight of PERK, which has been associated with increased  
953 phosphorylation and activation of this protein kinase. (B) XBP-1 specific primers were used  
954 to analyze XBP-1 mRNA cleavage (u refers to unspliced and s to spliced mRNA) in cells

955 expressing WT or mutant CIC-5. In this case, both BfA and TN induced XBP-1 cleavage. On  
956 the other hand, neither *CLCN5* silencing nor any of the CIC-5 mutants induced detectable  
957 cleavage of XBP-1.

958

959 **Figure S3. mRNA expression levels of DNA microarray validation genes.** To validate  
960 the reliability of the results obtained from the DNA microarray, the expression levels of  
961 *EMX2*, *PTPRD*, *STEAP1*, *ZPLD1*, *CDH1*, *NR1H4* and *EHF* genes were analyzed by qRT-  
962 PCR. Validation genes were selected among those that meet the following requirements: i)  
963 their expression was altered by some of the mutations compared to the WT condition and, ii)  
964 its expression was also modified by the silencing of *CLCN5* and totally or partially restored  
965 by CIC-5 WT re-introduction. All genes showed an expression pattern that correlated with  
966 that observed in the DNA microarray.

967

968 **Figure S4. Number of genes in each range of differential expression.** The number of  
969 genes in the DNA microarray whose expression was altered within a range of logFC for an  
970 adjusted p value lower than 0.05 in each of the comparisons that we have performed in this  
971 work.

# Figure 1

bioRxiv preprint doi: <https://doi.org/10.1101/2020.12.16.423143>; this version posted (which was not certified by peer review) is the author/funder. All rights reserved.

## A.

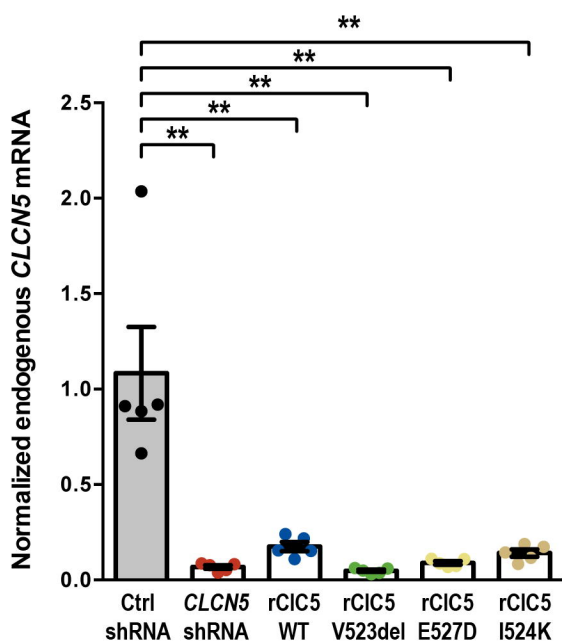

## B.

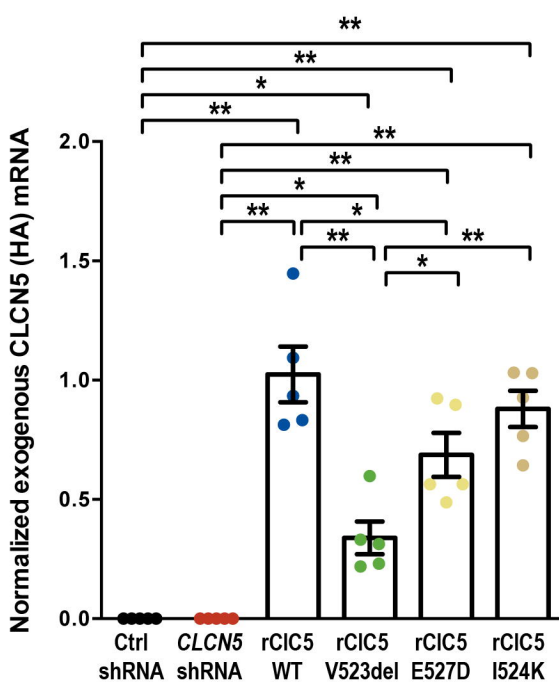

## C.

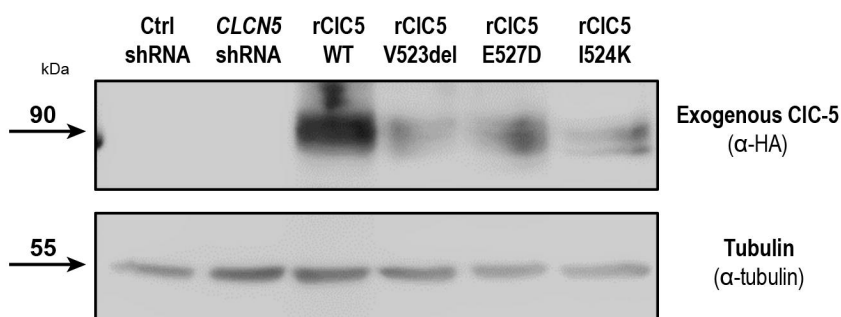



# Figure 2

**A.**

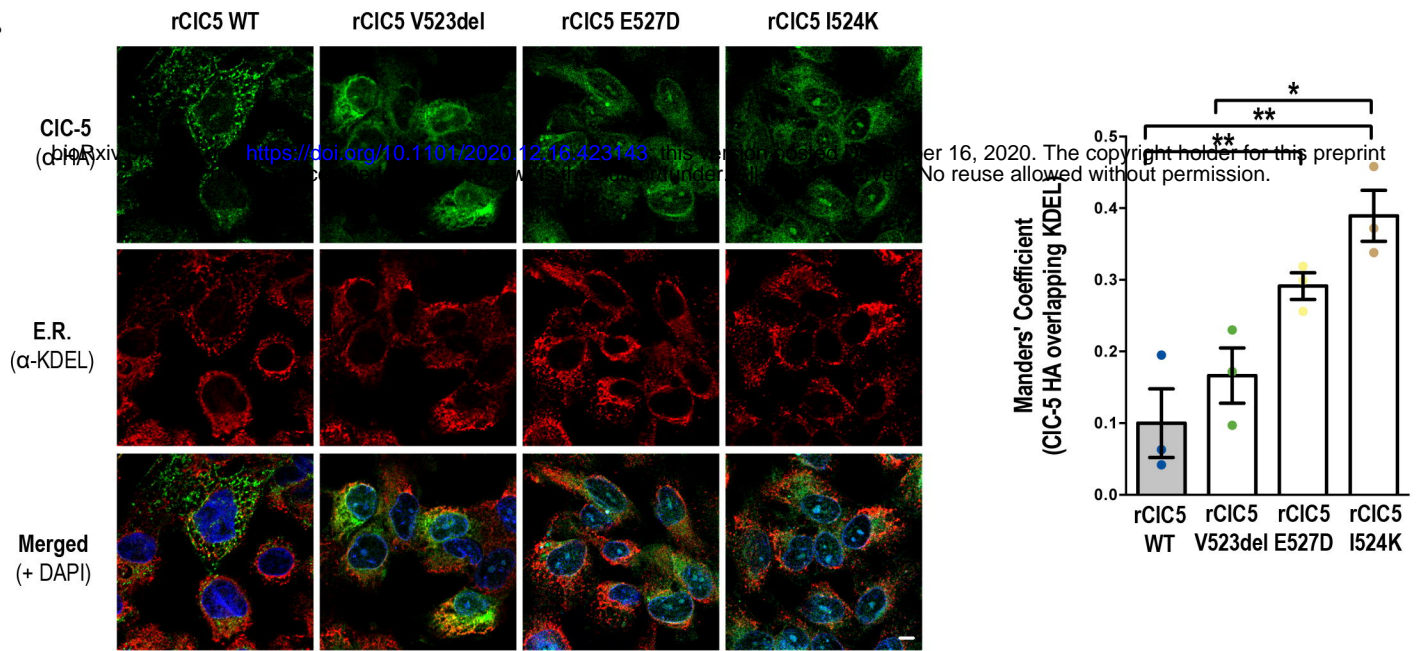

**B.**

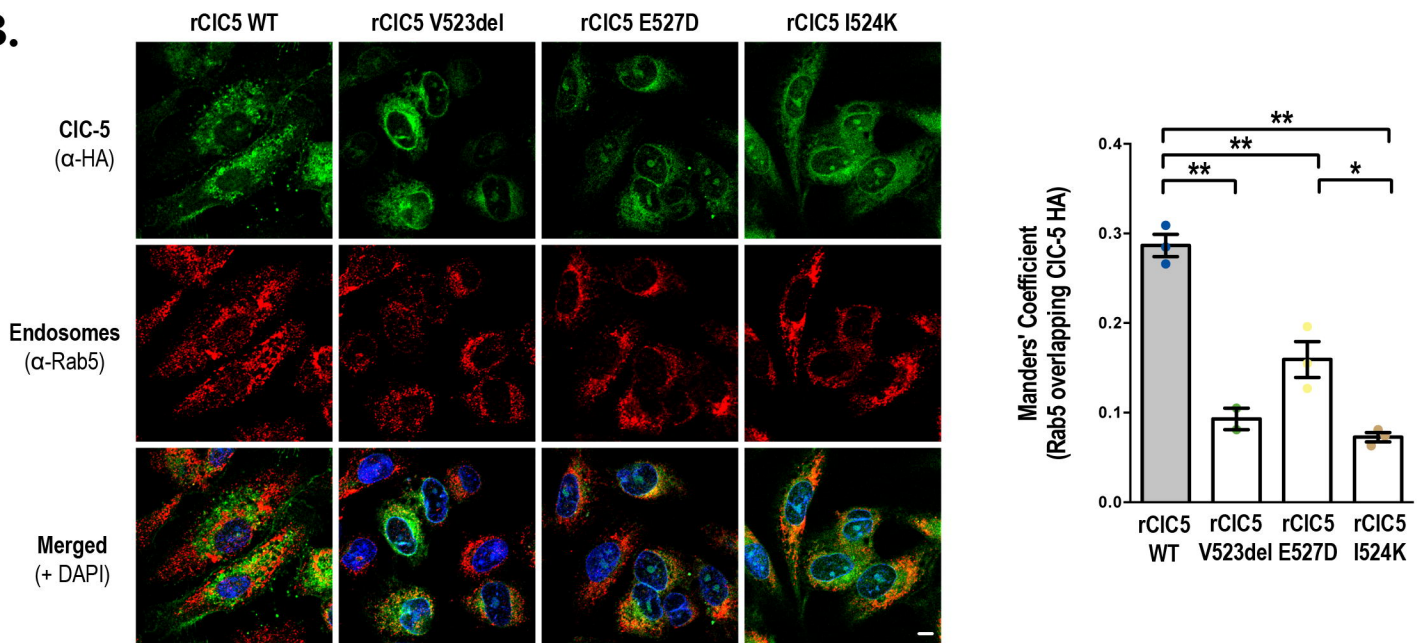

**C.**

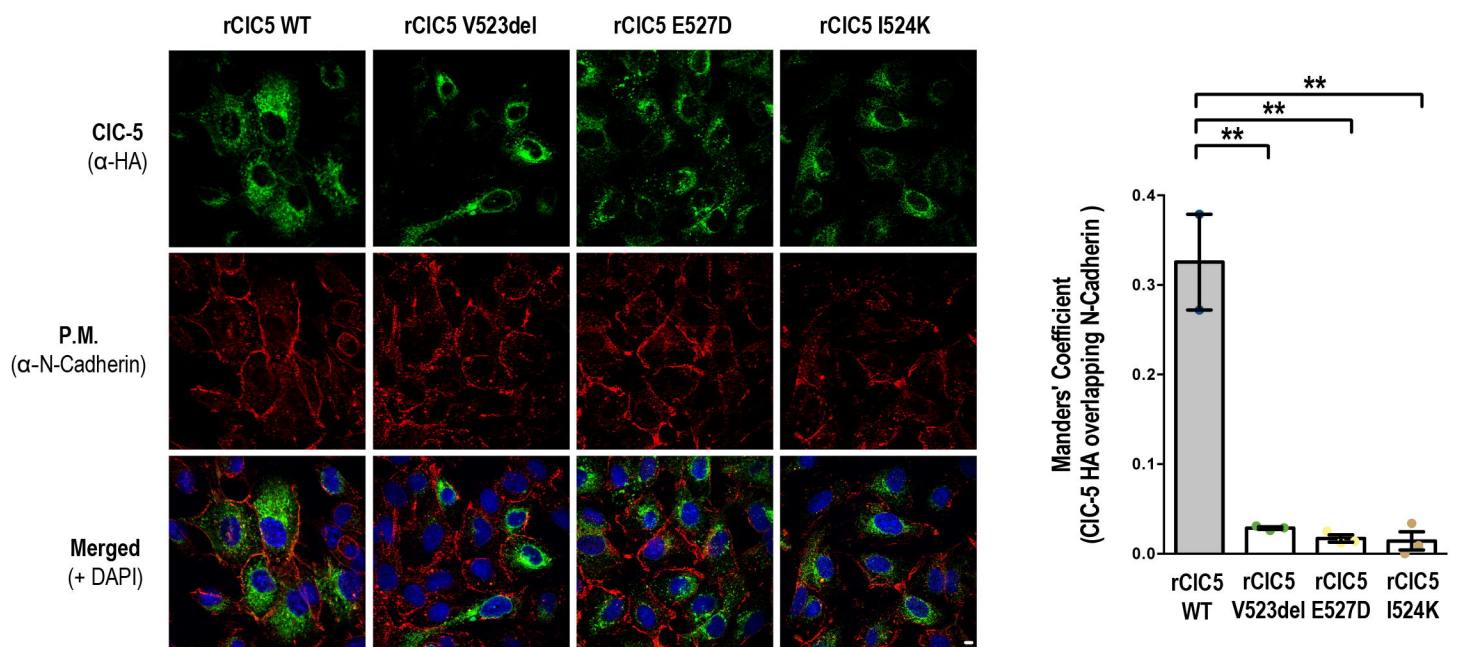

**Figure 3**

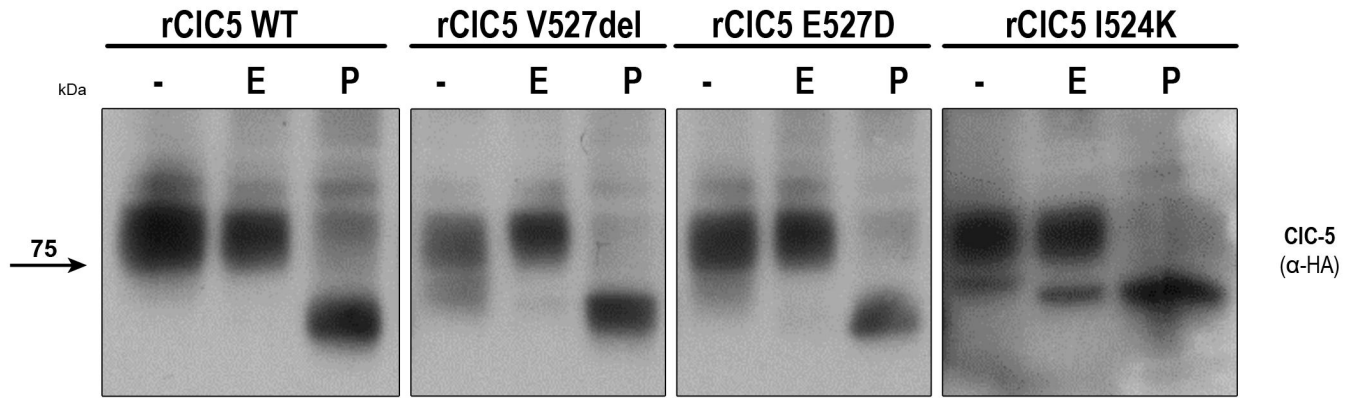

# Figure 4

**A.**

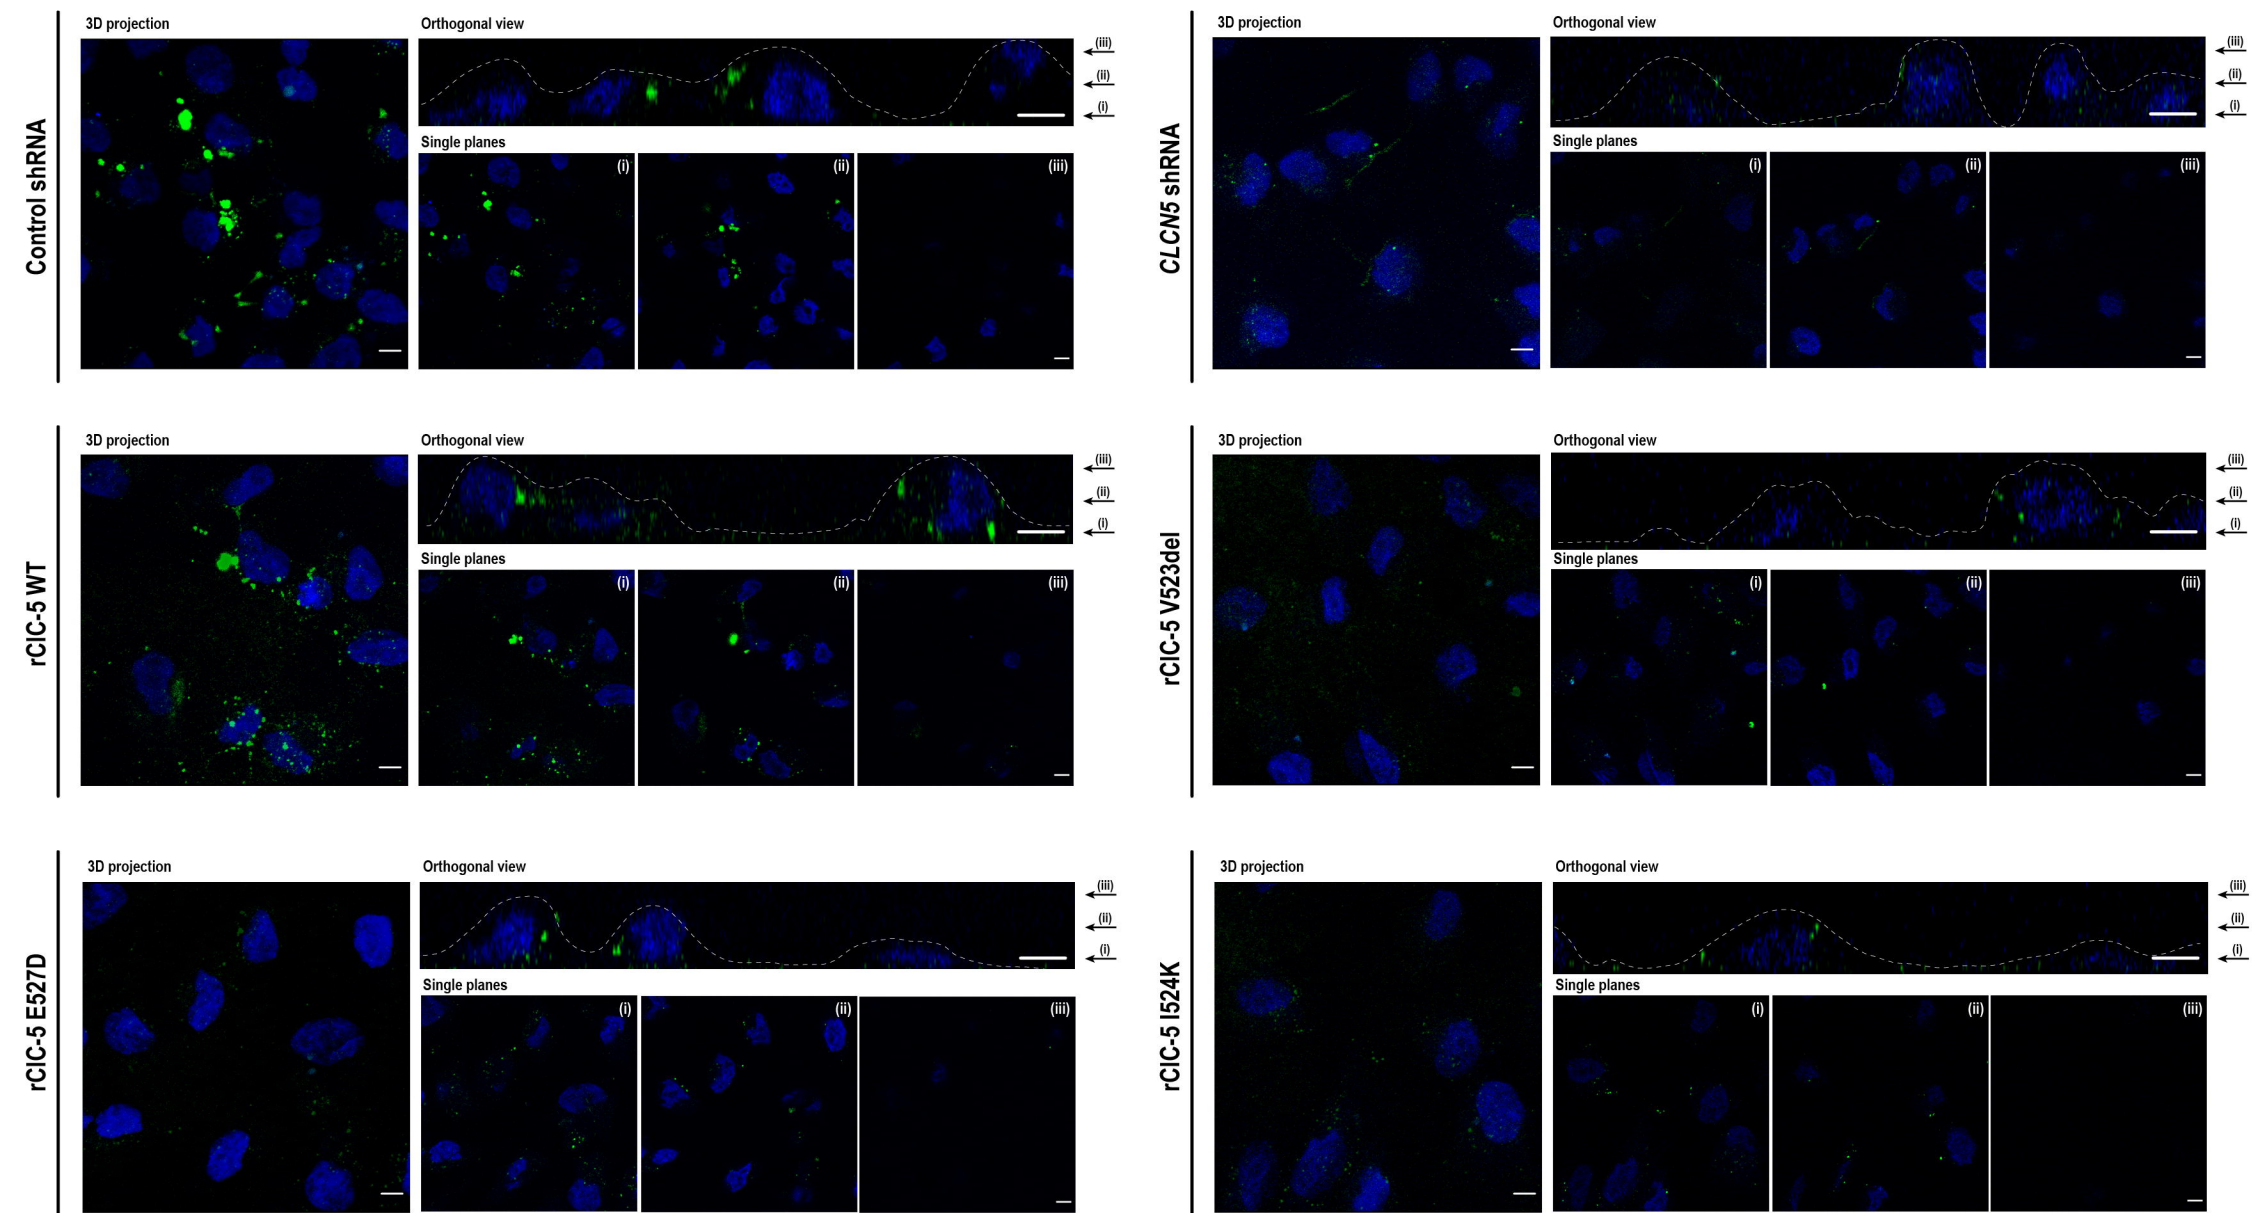

**B.**

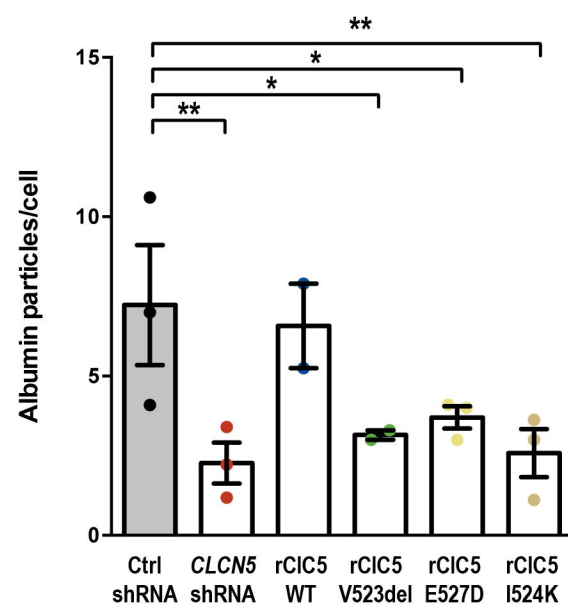

**C.**

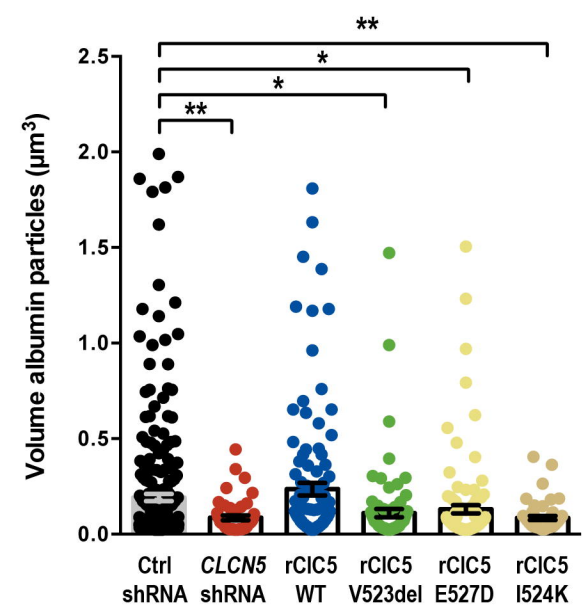

# Figure 5

## A.

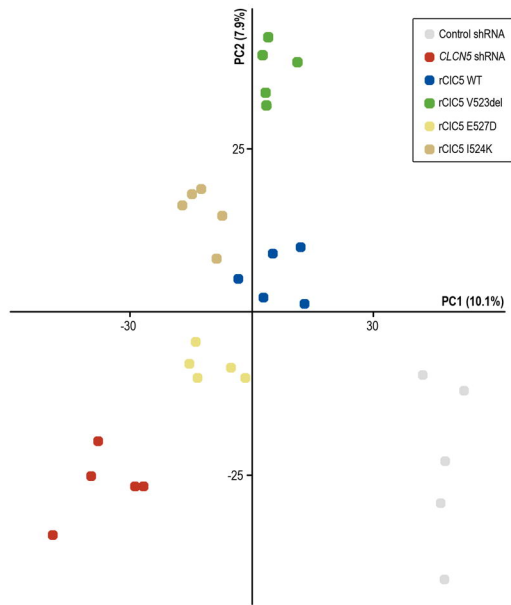

## B.

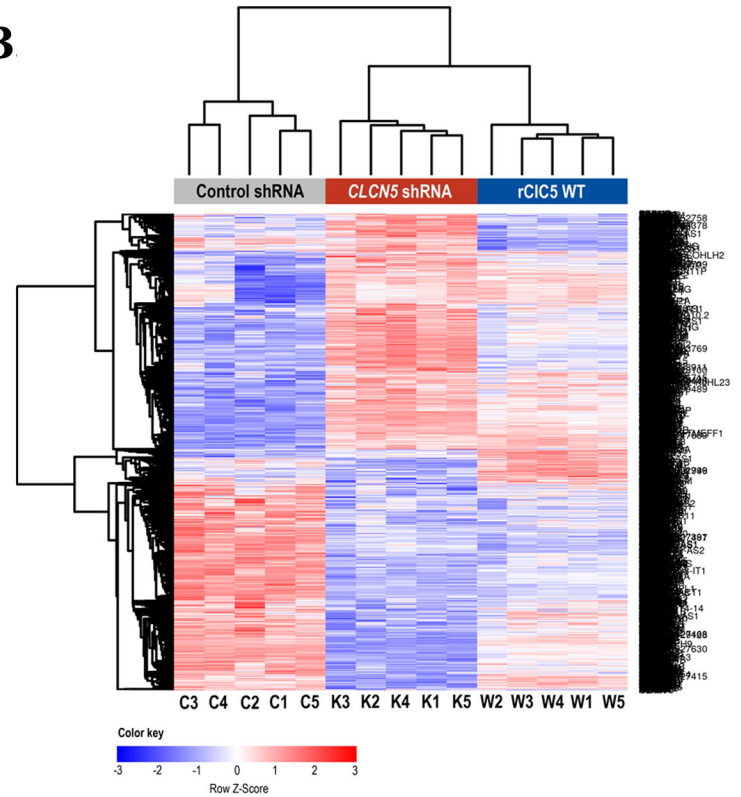

## C.

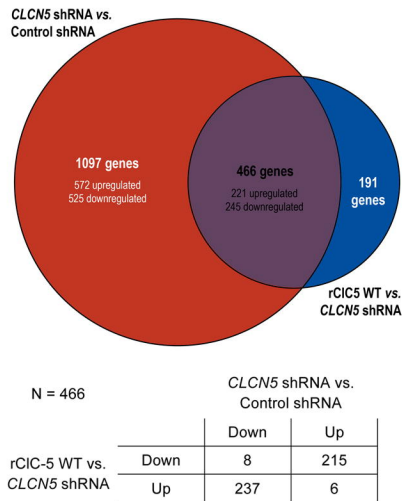

## D.

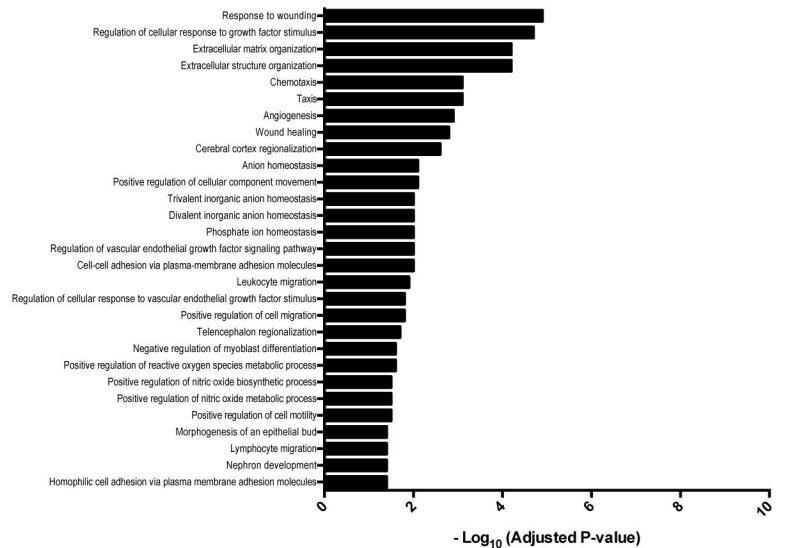

# Figure 6

## A.

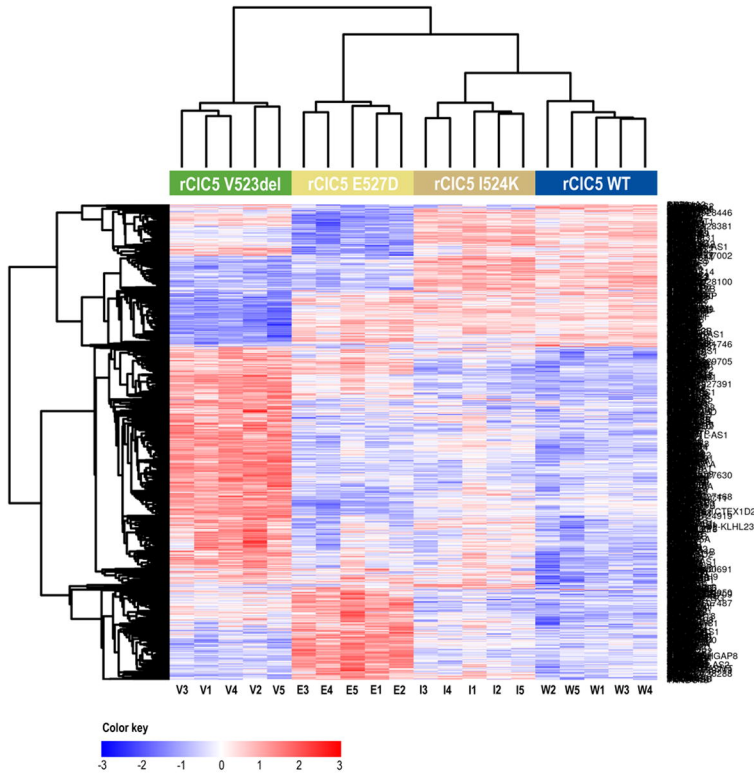

## B.

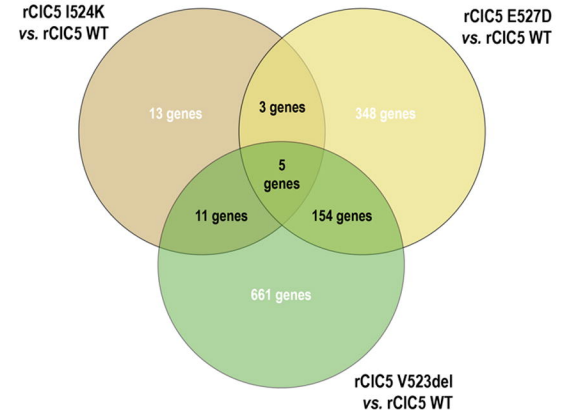

## C.

### V523del vs. WT

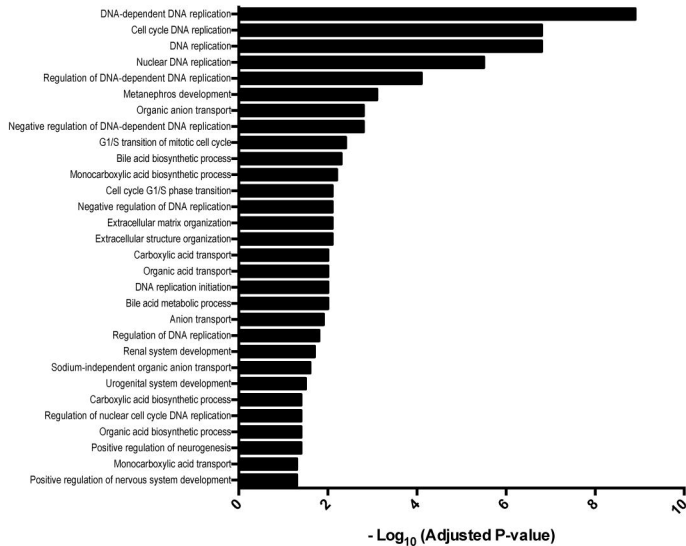

## D.

### E527D vs. WT

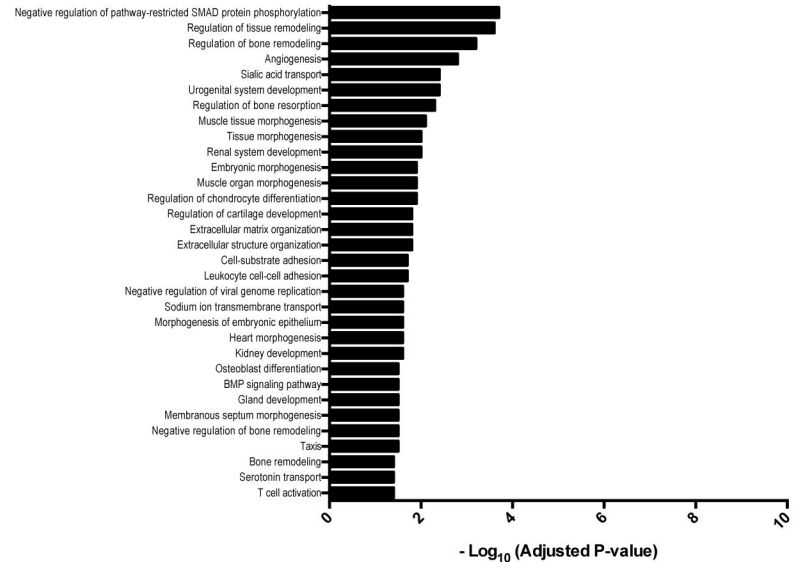

**Figure 7**

**A.**

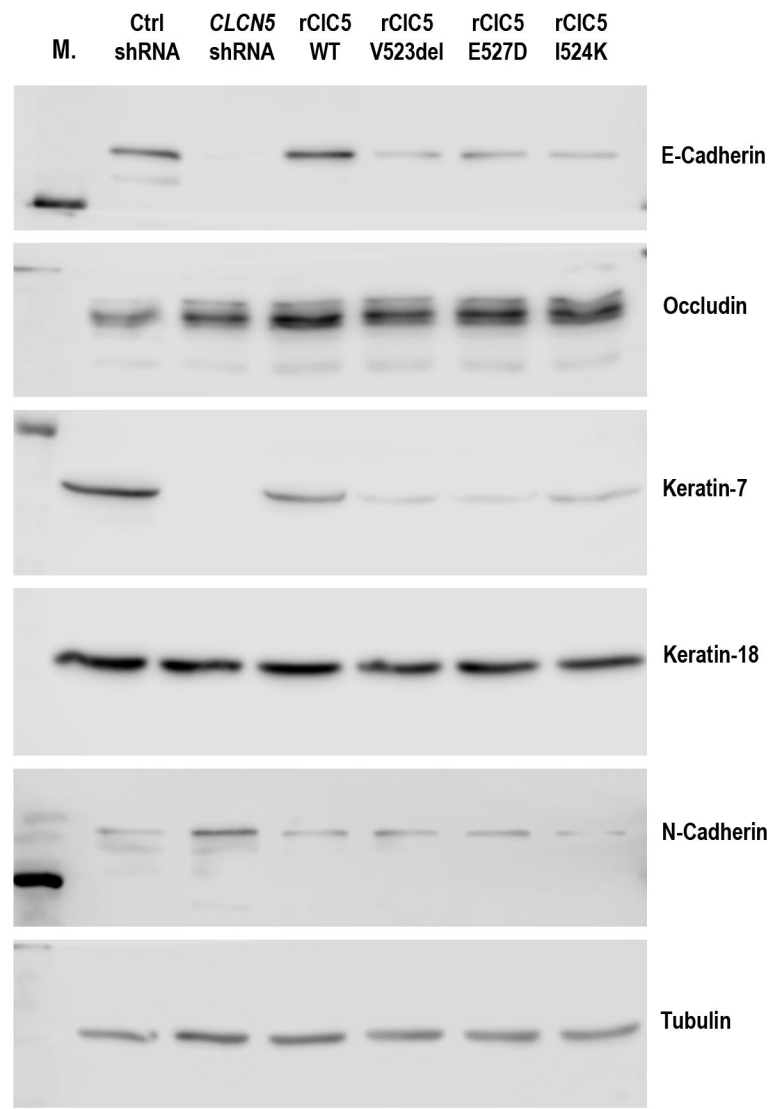

**B.**

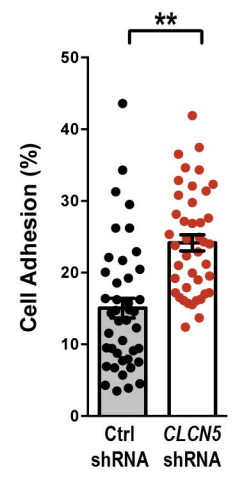

**C.**

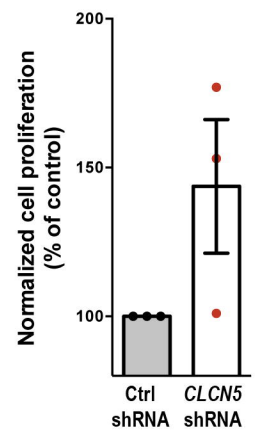

**D.**

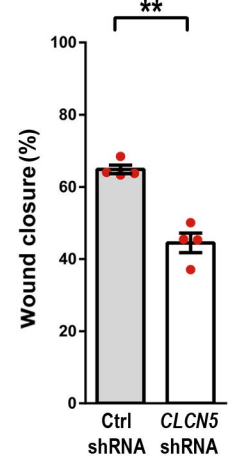

**E.**

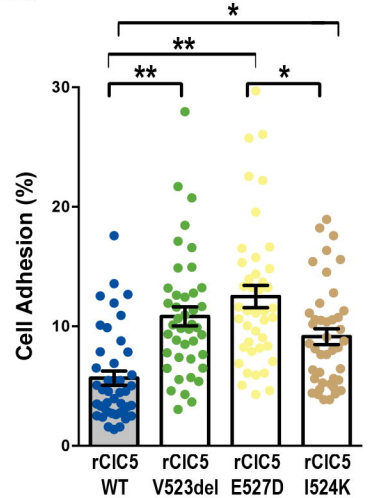

**F.**

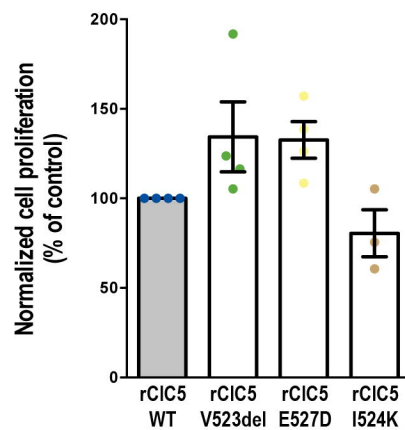

**G.**

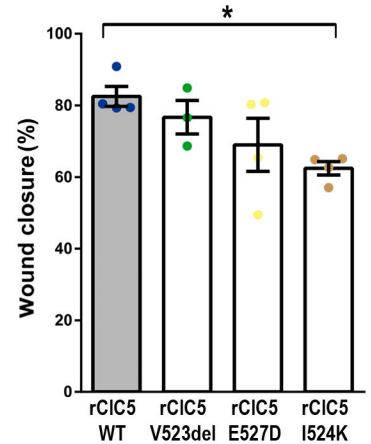

# Figure S1

## A.

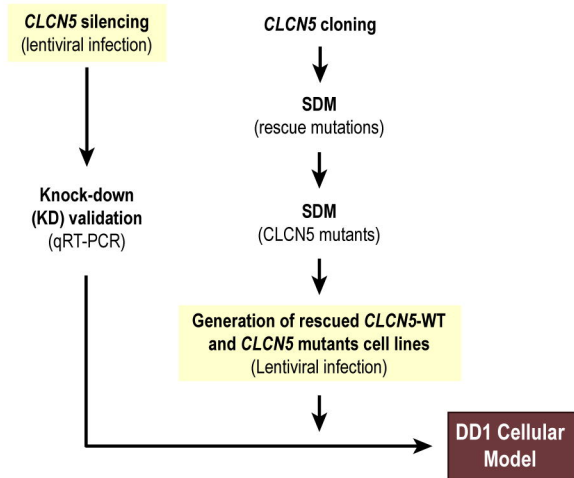

## B.

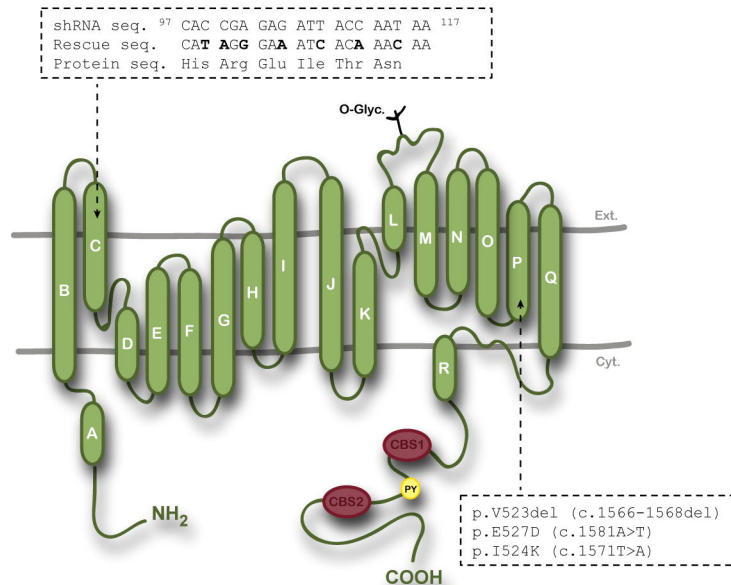





# Figure S3

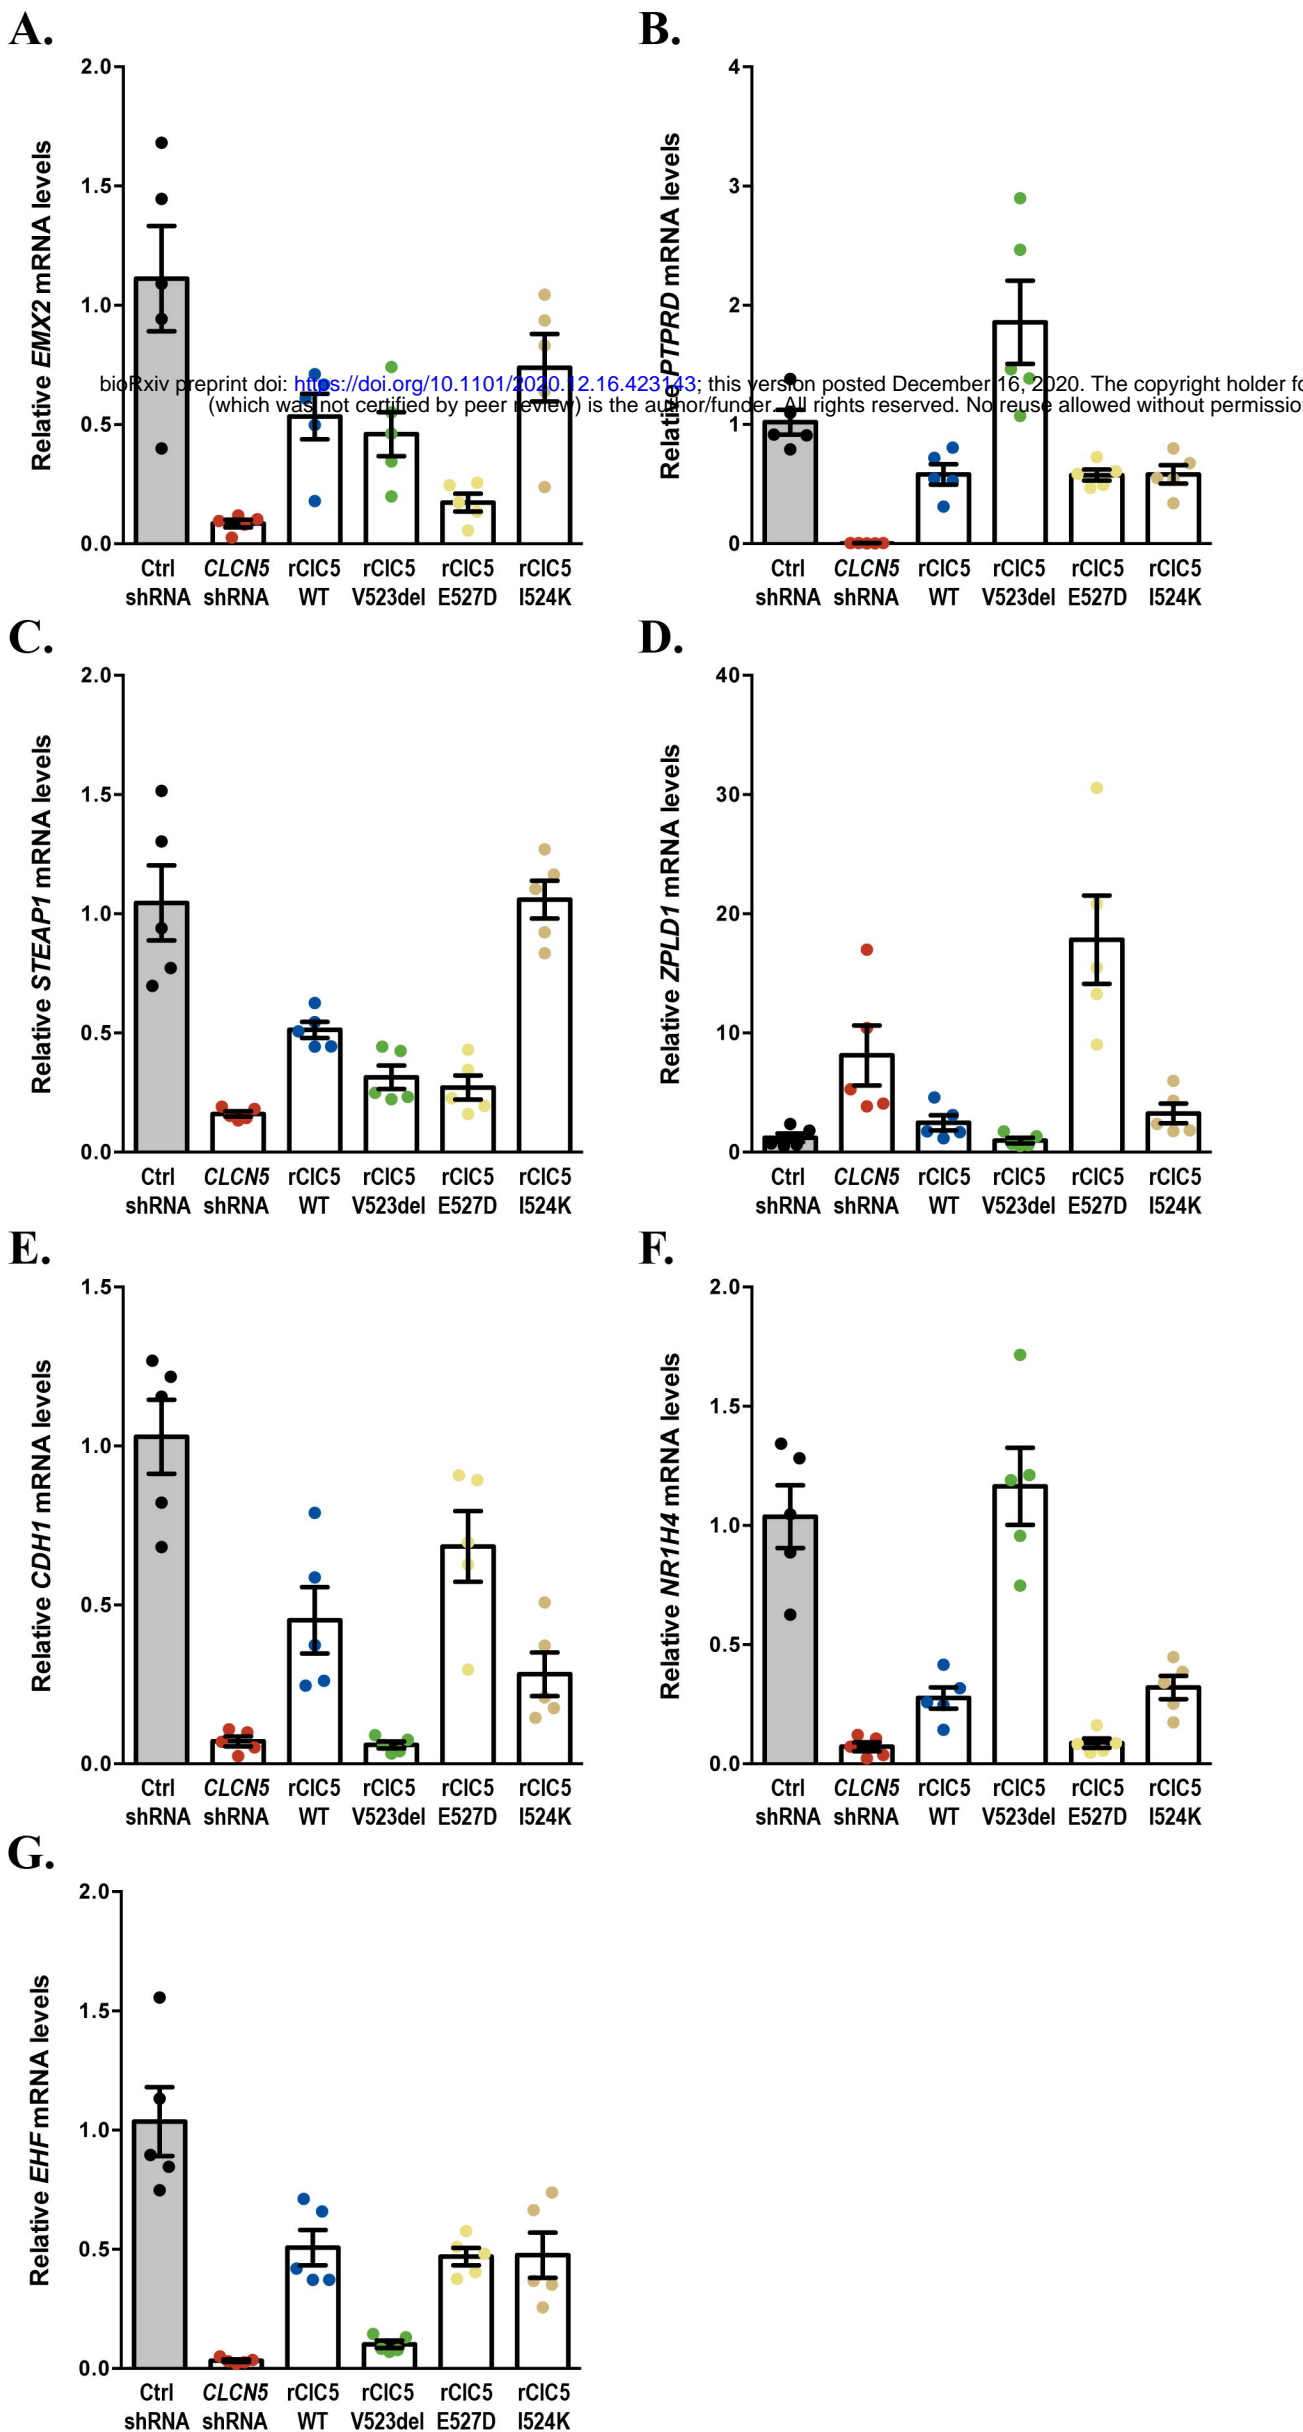

Source: https://www.biorxiv.org/content/10.1101/2020.12.16.423143v1.full.pdf
